# Supplementary material for: Phylogeography of sharks and rays: a global review based on life history traits and biogeographic partitions
Source: PubMed Central journal article supplement (PMC10239618; doi:10.7717/peerj.15396), 2023-06-01

**Supplemental figures for:**

**Phylogeography of sharks and rays: A global review based on life history traits  
and biogeographic partitions**

Sudha Kottillil, Chetan Rao, Brian W. Bowen, Kartik Shanker

**Figures:**

**Figure S1**

Page 2

**Figure S2**

Page 7

**Figure S1:** Median joining haplotype networks constructed using cytochrome c oxidase subunit I sequences of 40 shark species belonging to 17 genera.

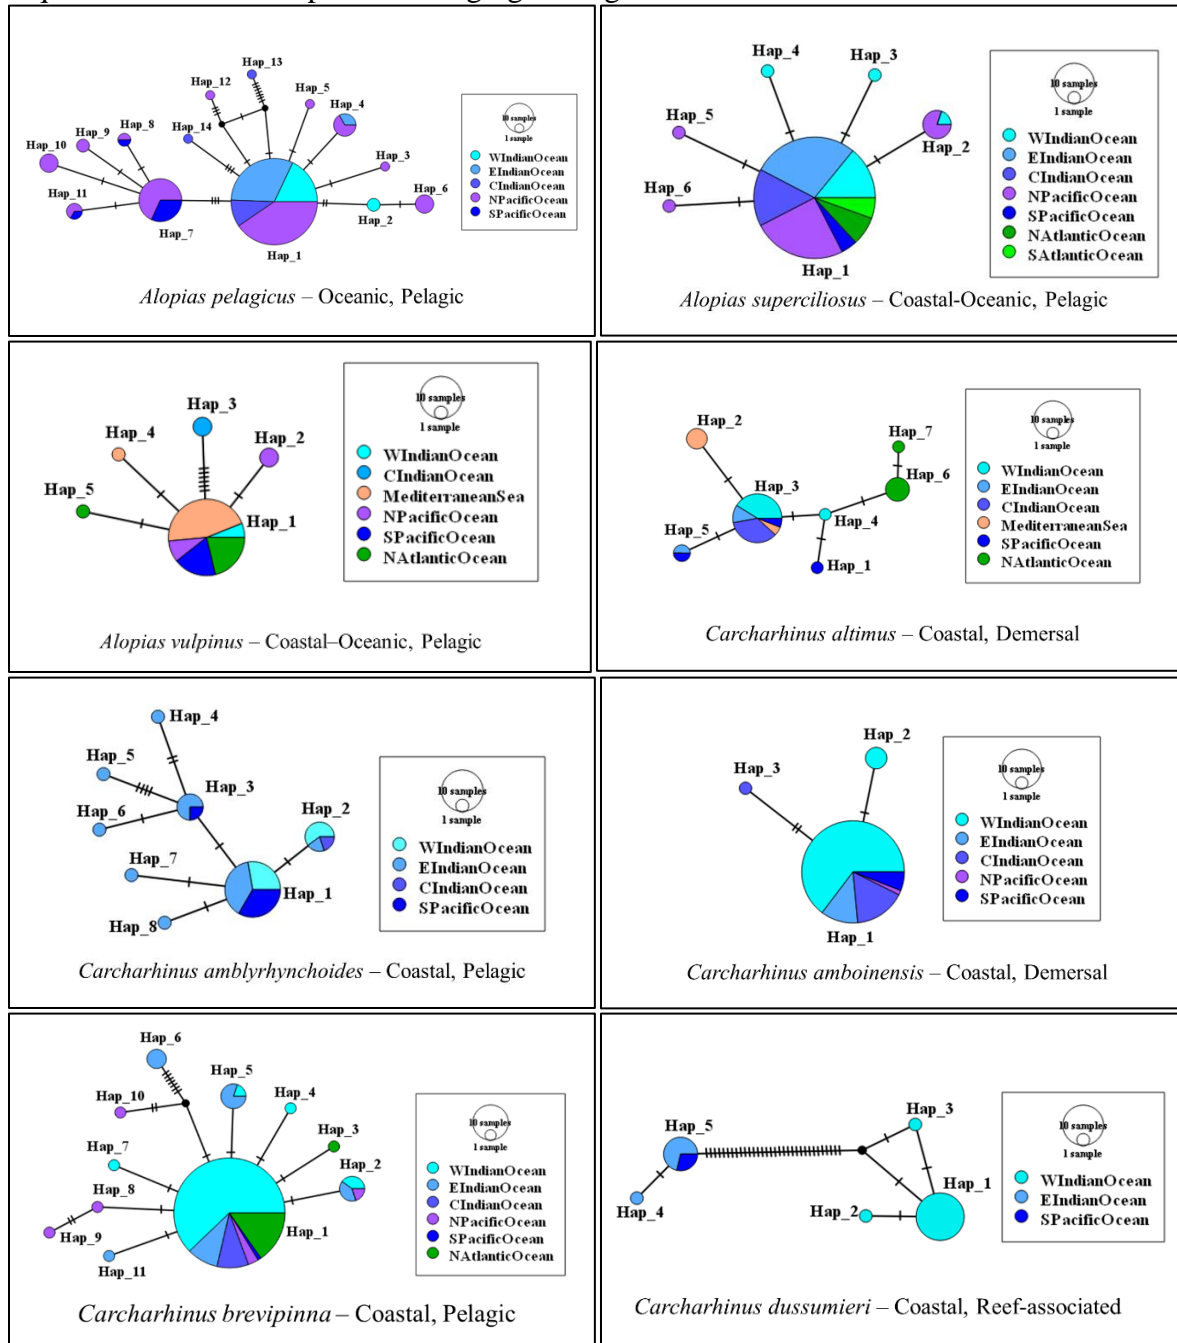

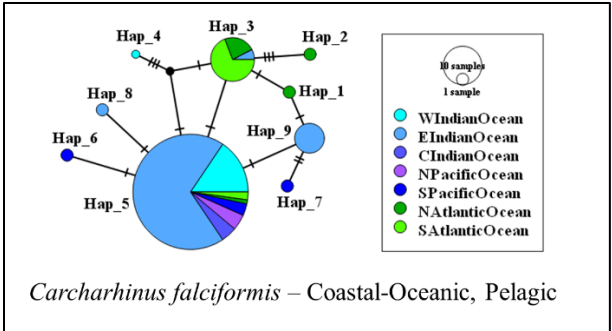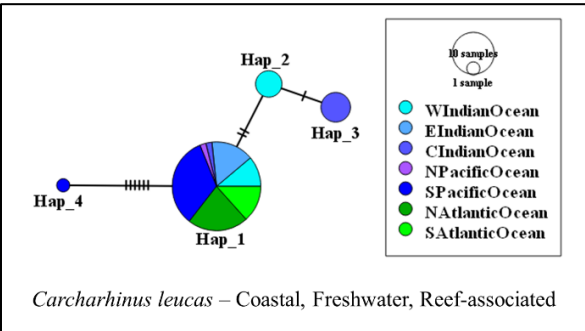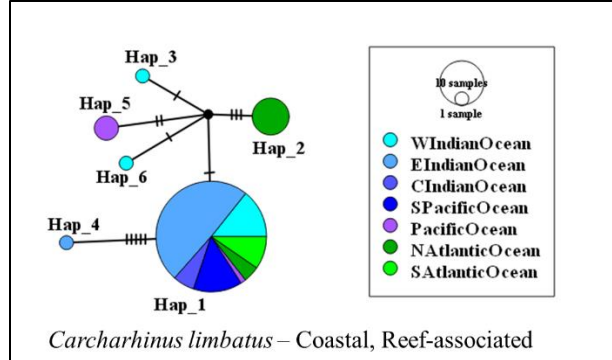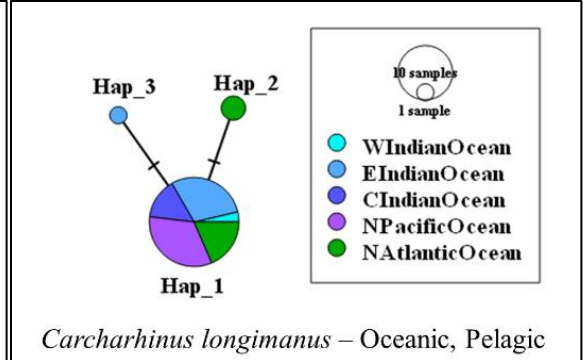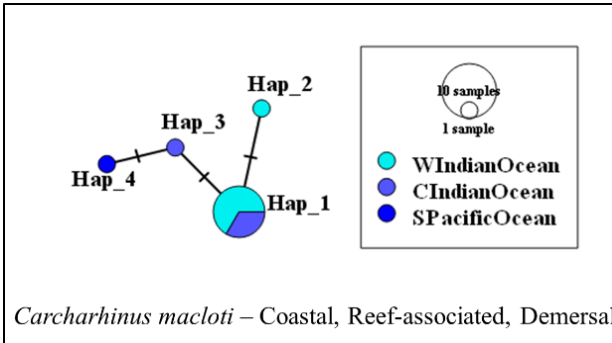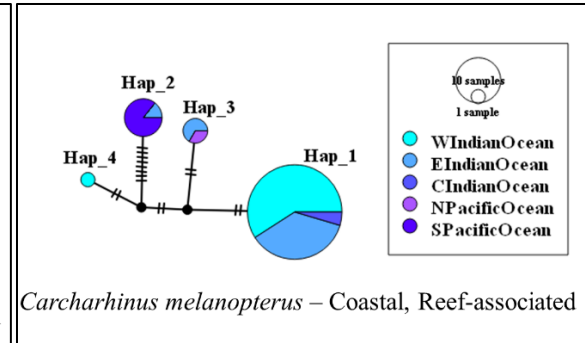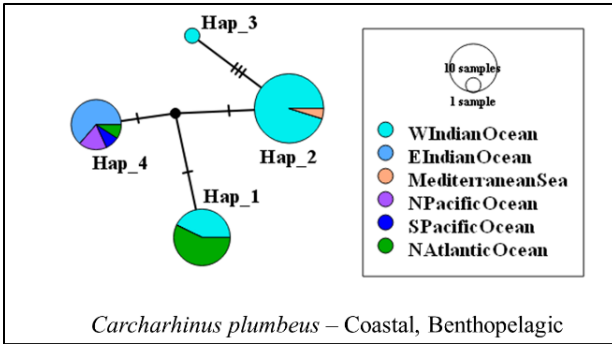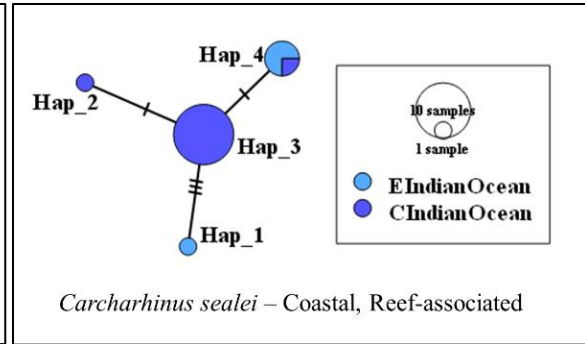

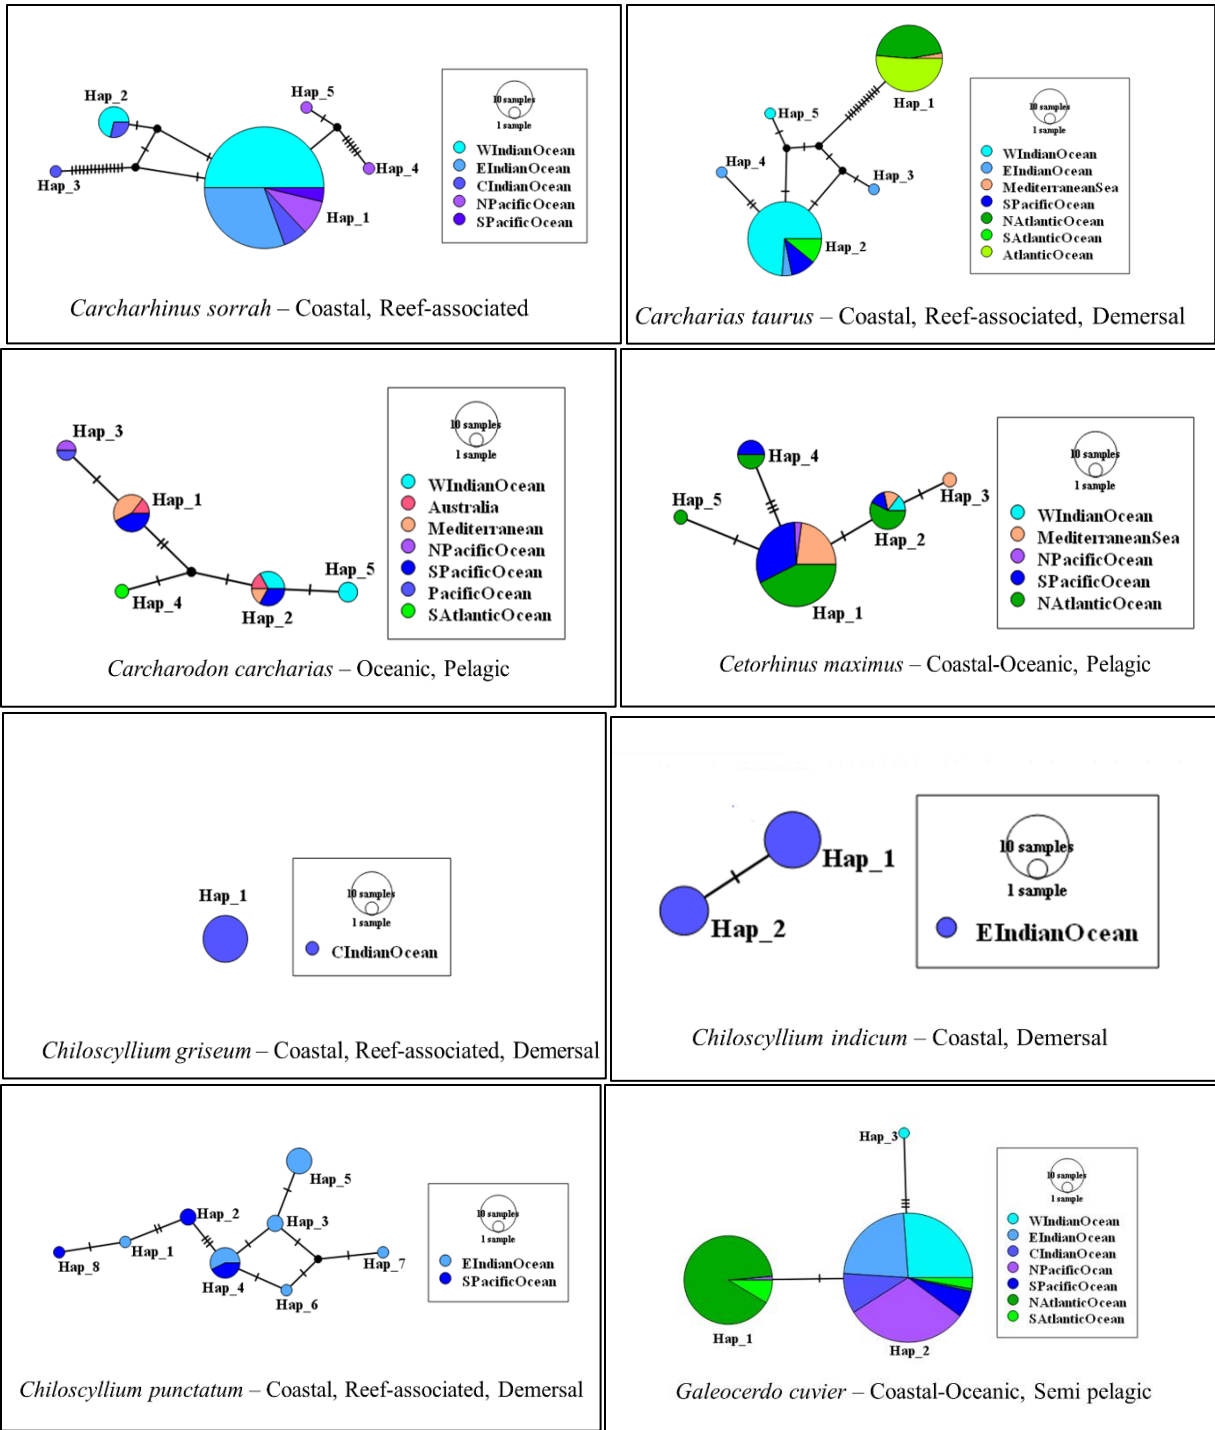

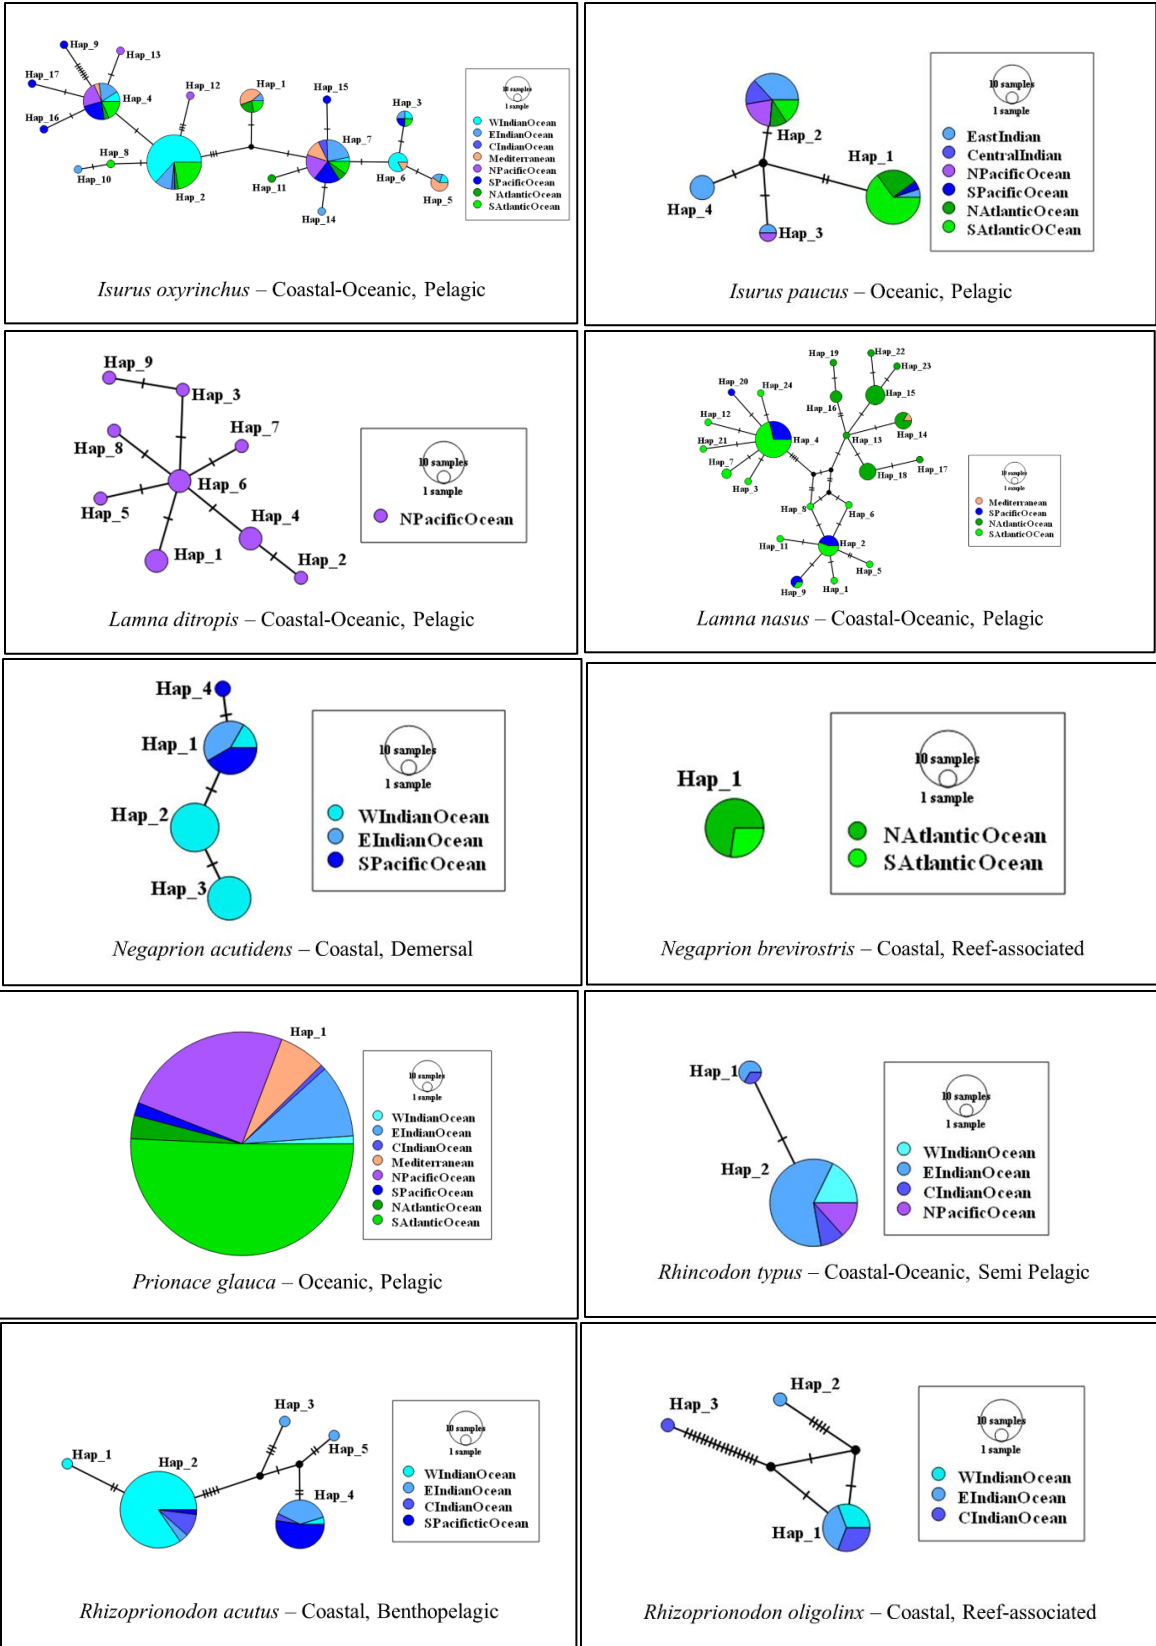

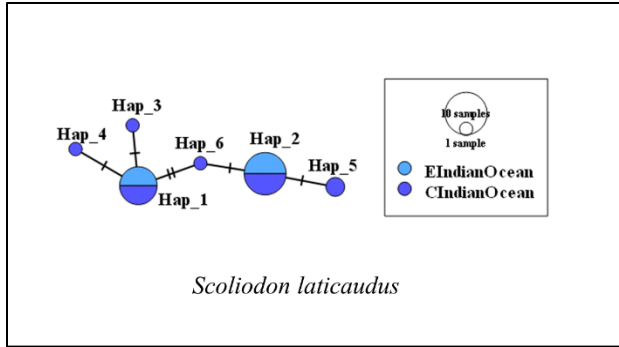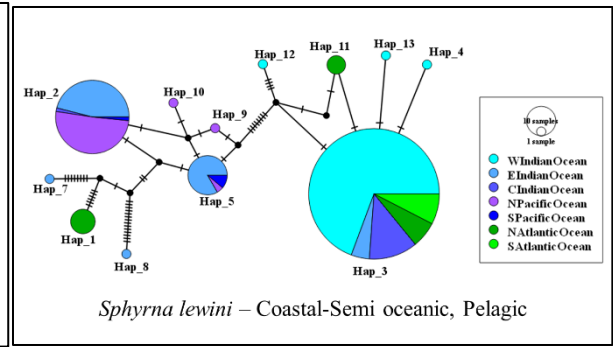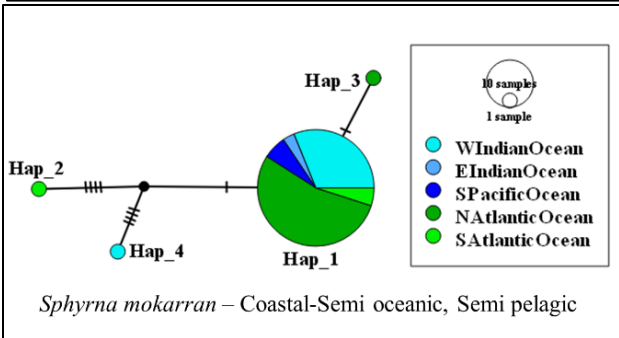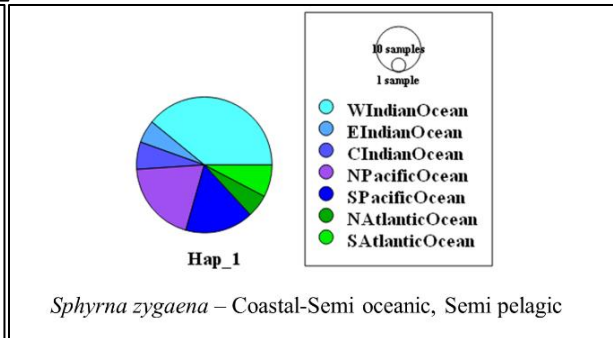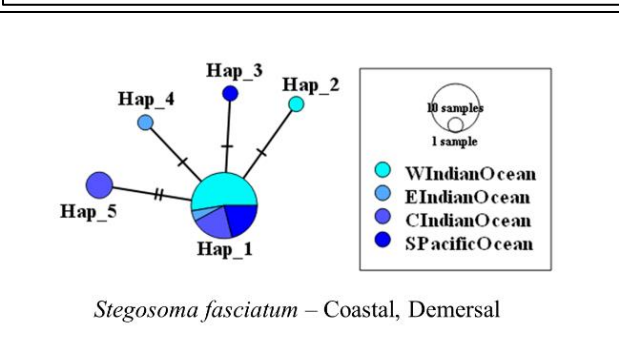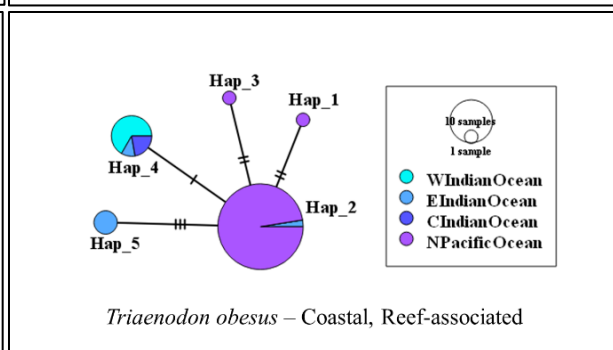

**Figure S2:** Median joining haplotype networks constructed using cytochrome c oxidase subunit I sequences of 19 ray species belonging to 11 genera.

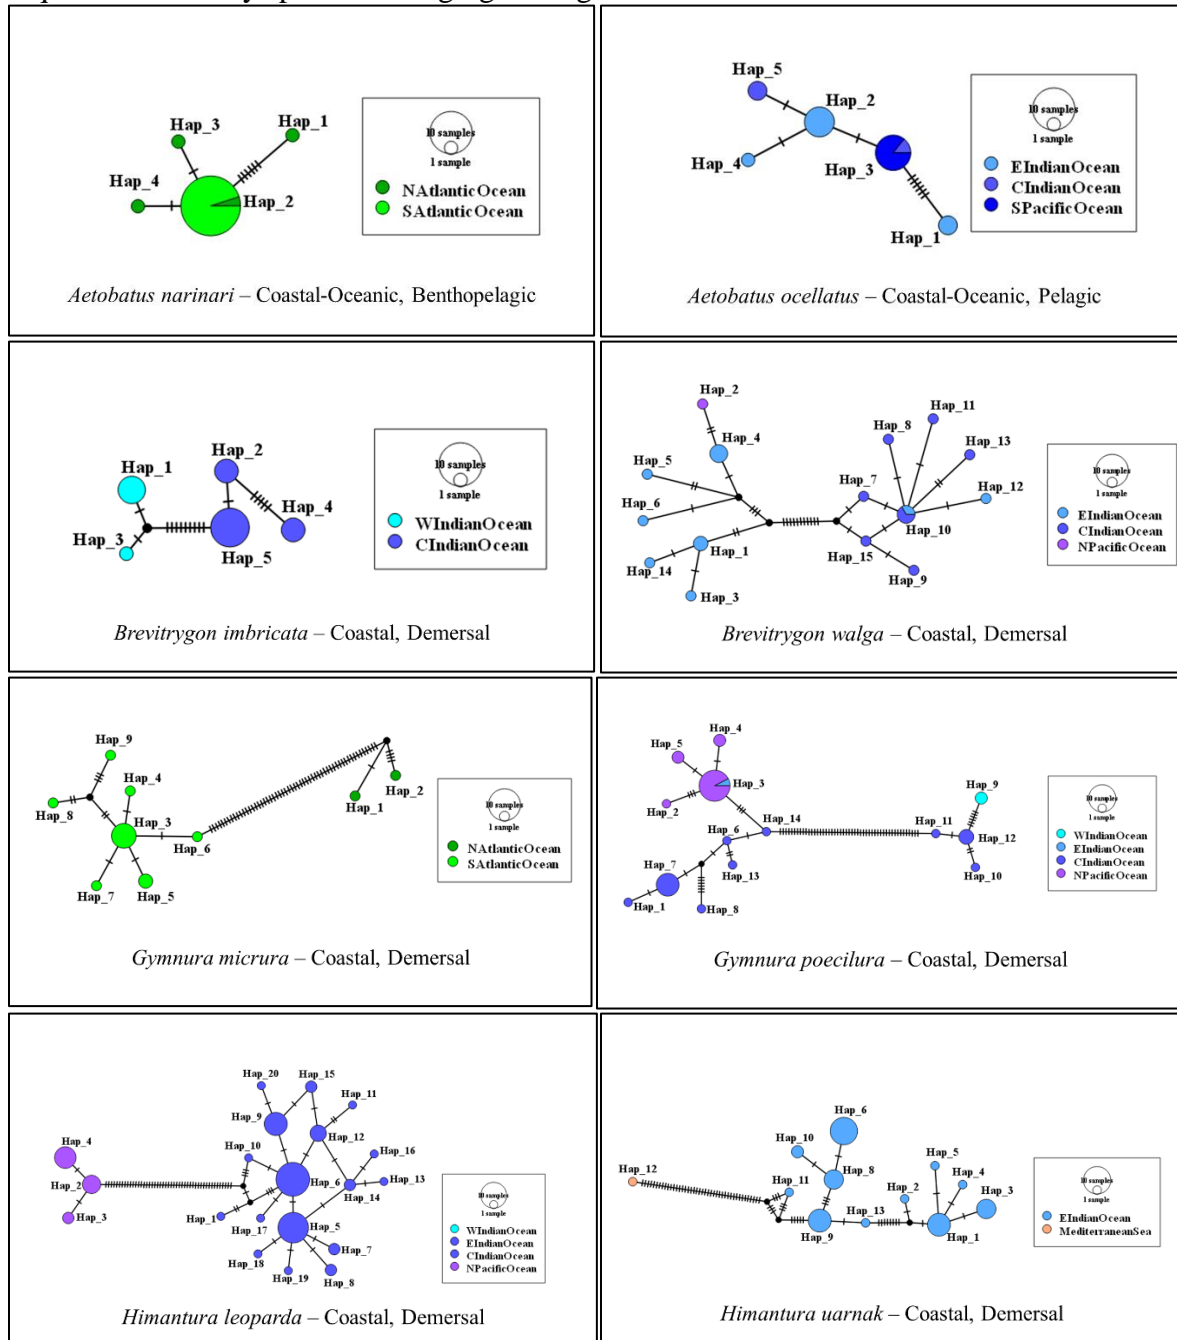

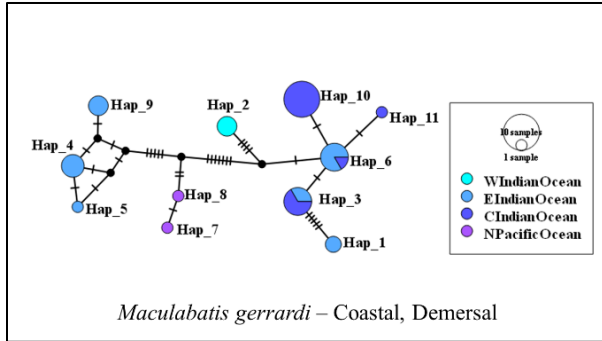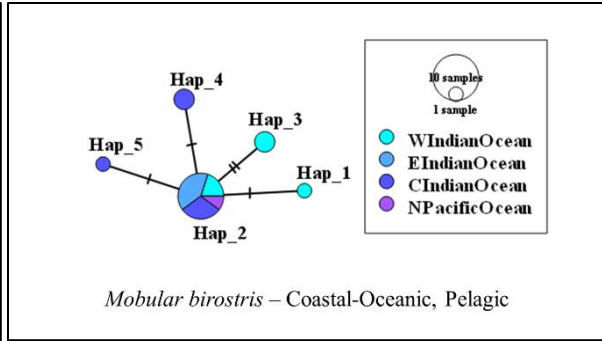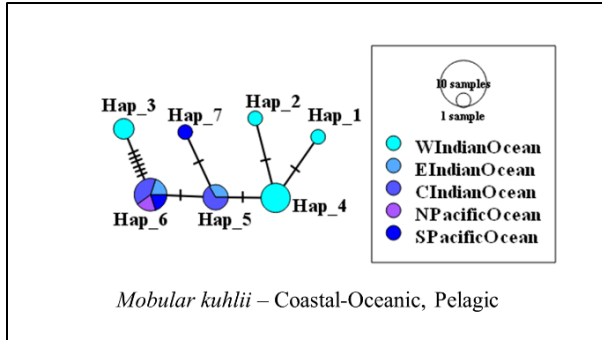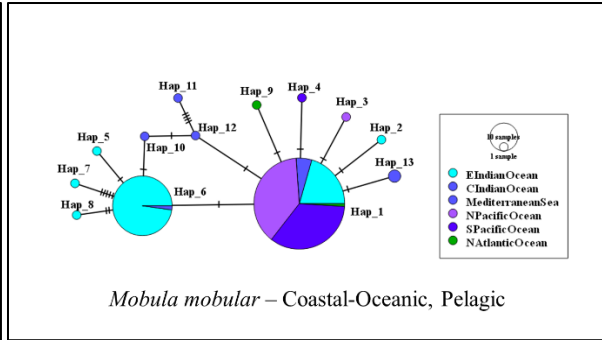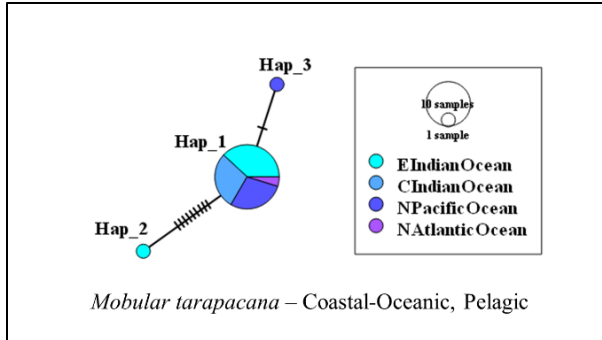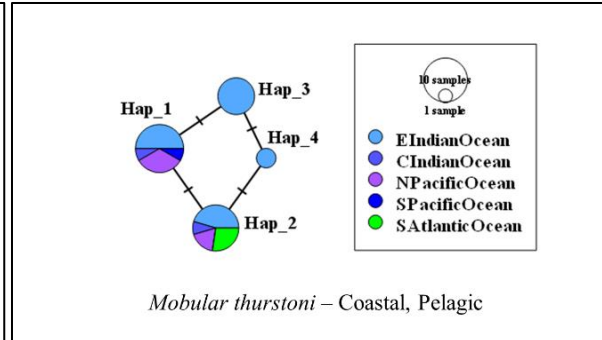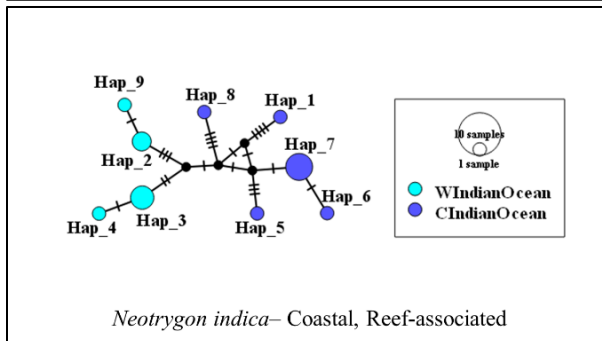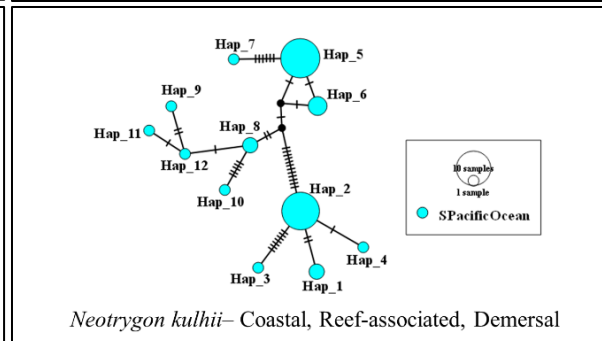



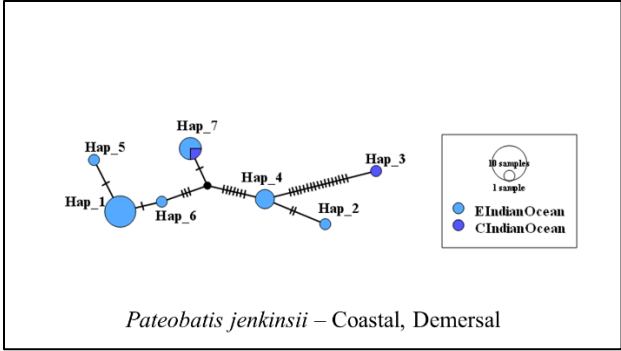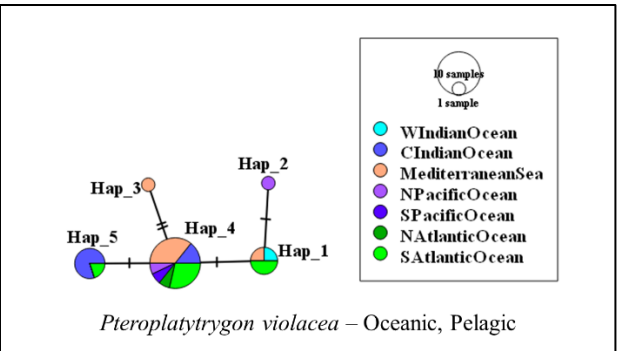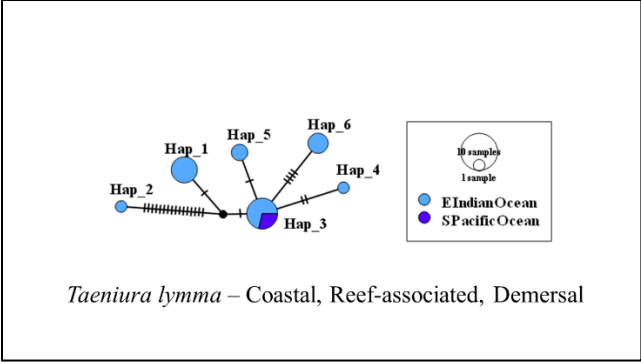

Supplement: peerj-11-15396-s001.pdf [file peerj-11-15396-s001.pdf]
