# Supplementary material for: Phylogeography of sharks and rays: a global review based on life history traits and biogeographic partitions
Source: PubMed Central journal article supplement (PMC10239618; doi:10.7717/peerj.15396), 2023-06-01
Supplement: peerj-11-15396-s002.pdf [file peerj-11-15396-s002.pdf]

**Supplemental tables for:**

**Phylogeography of sharks and rays: A global review based on life history traits  
and biogeographic partitions**

Sudha Kottillil, Chetan Rao, Brian W. Bowen, Kartik Shanker

**Table of Contents:**

|                 |         |
|-----------------|---------|
| <b>Table S1</b> | Page 2  |
| <b>Table S2</b> | Page 24 |
| <b>Table S3</b> | Page 32 |
| <b>Table S4</b> | Page 34 |

**Table S1:** List of authors along with the corresponding GenBank accession numbers of cytochrome c oxidase subunit I (COI) sequences of shark species ( $n = 40$ ) that have been used in the present study. Asterix (\*) indicate sequences that have not been published but is available on GenBank.

| <b>Species name (sharks)</b> | <b>Authors</b>                         | <b>Accession numbers of COI sequences in GenBank</b>                                                                                                                          |
|------------------------------|----------------------------------------|-------------------------------------------------------------------------------------------------------------------------------------------------------------------------------|
| <i>Alopias pelagicus</i>     | Bineesh et al. (2016)                  | KF899545–KF899548 and HM239672                                                                                                                                                |
|                              | Cardenosa et al. (2014)                | KM218907–KM218923                                                                                                                                                             |
|                              | Chuang et al. (2016)                   | KP719248–KP719286                                                                                                                                                             |
|                              | Hacohen-Domene et al. (2018)*          | MK188807                                                                                                                                                                      |
|                              | Jabado et al. (2015b)                  | KP193429, KP193394, KP193357, KP193344, KP193340, KP193335, KP193328, KP193312, KP193299, KP193282, KP193273, KP193269, KP193264, KP193238.1, KP193237, KP193223 and KP193173 |
|                              | Kumar et al. (2015)                    | JX978330                                                                                                                                                                      |
|                              | Liu et al. (2013)                      | KF606768, KF606777, KF606787, KF606798, KF606800, KF606824, KF606838, KF606840, KF606842, KF606848, KF606850, KF606852, KF606859 and KF606941–KF606943                        |
|                              | Manjusha and Madhusoodanakurup (2010)* | HQ589266 and HQ589267                                                                                                                                                         |
|                              | Marín et al. (2018)                    | MH194433, MH194456 and MH194476                                                                                                                                               |
|                              | Sembiring et al. (2015)                | KF590224, KF590277, KF590278, KF590308–KF590313, KF590316, KF590328, KF590329, KF590332–KF590335, KF590351–KF590355, KF590439, KF590446, KF590503 and KC840948                |
|                              | Spaet and Berumen (2015)               | KM396948                                                                                                                                                                      |
|                              | Velez-Zuazo et al. (2015)              | KJ146022–KJ146026                                                                                                                                                             |
|                              | Wong et al. (2009)                     | FJ518964–FJ518975, FJ519183–FJ519185                                                                                                                                          |

---

|                              |                                           |                                                                                                                                                                                             |
|------------------------------|-------------------------------------------|---------------------------------------------------------------------------------------------------------------------------------------------------------------------------------------------|
| <i>Alopias superciliosus</i> | Bineesh et al. (2016)                     | HM239673 and KF899549–KF899556                                                                                                                                                              |
|                              | Chuang et al. (2016)                      | KP719264–KP719280, KP719469, KP719470 and KP719487–<br>KP719490                                                                                                                             |
|                              | Deepak et al. (2013)*                     | KF700944 and KF700945                                                                                                                                                                       |
|                              | Hastings and Burton (2008)*               | EU400162                                                                                                                                                                                    |
|                              | Hastings and Burton (2010)*               | GU440213 and GU440214                                                                                                                                                                       |
|                              | Jabado et al. (2015b)                     | KP193168, KP193210, KP193226, KP193272, KP193297, KP193301,<br>KP193322, KP193342, KP193381, KP193400, KP193414, KP193419,<br>KP193425, KP193436 and KP193454                               |
|                              | Kumar et al. (2015)                       | JX978336                                                                                                                                                                                    |
|                              | Liu et al. (2013)                         | KF606813                                                                                                                                                                                    |
|                              | Manjusha and<br>Madhusoodanakurup (2010)* | HM990646–HM990649 and HM990651                                                                                                                                                              |
|                              | Sembiring et al. (2015)                   | KF590221, KF590226, KF590228, KF590248, KF590331, KF590337,<br>KF590404, KF590406–KF590409, KF590417–KF590419, KF590483,<br>KF590487–KF590490, KF590499, KF793744, KF793770 and<br>KC840955 |
|                              | da Silva Ferrette et al. (2019)           | MH911331–MH911335                                                                                                                                                                           |
|                              | Vella et al. (2017)                       | MF405097                                                                                                                                                                                    |
|                              | Ward et al. (2005)                        | DQ108329, DQ108330                                                                                                                                                                          |
|                              | Ward et al. (2008)                        | EU398519–EU398521                                                                                                                                                                           |
|                              | Wong et al. (2009)                        | FJ518976–FJ518986, FJ519032–FJ519034, FJ519601 and FJ519603                                                                                                                                 |
|                              | Zacharia et al. (2016)*                   | KX063632                                                                                                                                                                                    |

|                                      |                                                   |                                                                         |
|--------------------------------------|---------------------------------------------------|-------------------------------------------------------------------------|
| <i>Alopias vulpinus</i>              | <b>Aguilar et al. (2020)*</b>                     | <b>MT456029 and MT456102</b>                                            |
|                                      | Bineesh et al. (2016)                             | KF899557 and KF899558                                                   |
|                                      | Cariani et al. (2017)                             | KT307158–KT307160                                                       |
|                                      | Keskin, (2010)                                    | HQ167643                                                                |
|                                      | Lakra et al. (2011)                               | FJ347901–FJ347904                                                       |
|                                      | Steinke et al. (2015)                             | JF492808 and JF492809                                                   |
|                                      | Vella et al. (2017)                               | KY909334–KY909344                                                       |
|                                      | Ward et al. (2008)                                | EU398522                                                                |
| Wong et al. (2009)                   | FJ518987–FJ518998, FJ519186–FJ519190 and FJ519605 |                                                                         |
| <i>Carcharhinus altimus</i>          | Appleyard et al. (2018)                           | MF508661 and MF508662                                                   |
|                                      | Berumen et al. (2019)                             | MH331689                                                                |
|                                      | Bineesh et al. (2016)                             | KF899783–KF899788                                                       |
|                                      | International Barcode of Life (2011)*             | JN313266                                                                |
|                                      | Jabado et al. (2015b)                             | KP193252, KP193277, KP193296, KP193376, KP193408, KP193441 and KP193445 |
|                                      | Moftah et al. (2011)                              | JN641206 and JN641207                                                   |
|                                      | Spaet and Berumen (2015)                          | KM396952                                                                |
|                                      | Ward et al. (2008)                                | EU398587–EU398589                                                       |
|                                      | Wong et al. (2009)                                | FJ519047 and FJ519049–FJ519052                                          |
| Yokes (2016)                         | KY176421                                          |                                                                         |
| <i>Carcharhinus amblyrhynchoides</i> | Appleyard et al. (2018)                           | MF508663 and MF508664                                                   |
|                                      | Haque et al. (2019)                               | MH841990                                                                |
|                                      | Jabado et al. (2015a)                             | KM973137–KM973141                                                       |
|                                      | Moore et al. (2011)                               | JN034896–JN034898 and JN082181–JN082185                                 |
|                                      | Ovenden et al. (2010)                             | GQ227287                                                                |

|                                 |                                     |                                                                                                                                                                                                                                                                                                                                            |
|---------------------------------|-------------------------------------|--------------------------------------------------------------------------------------------------------------------------------------------------------------------------------------------------------------------------------------------------------------------------------------------------------------------------------------------|
|                                 | Wainwright et al. (2018)            | MH243097–MH243100, MH243152, MH243153, MH243161, MH243164, MH243183 and MH243233                                                                                                                                                                                                                                                           |
|                                 | Ward and Holmes, (2007)             | EF609307                                                                                                                                                                                                                                                                                                                                   |
|                                 | Ward et al. (2008)                  | EU398590–EU398593                                                                                                                                                                                                                                                                                                                          |
| <i>Carcharhinus amboinensis</i> | Ahmed et al. (2021)                 | MH230957                                                                                                                                                                                                                                                                                                                                   |
|                                 | Appleyard et al. (2018)             | MF508671 and MF508672                                                                                                                                                                                                                                                                                                                      |
|                                 | Bineesh et al. (2016)               | KF899796                                                                                                                                                                                                                                                                                                                                   |
|                                 | Chuang et al. (2016)                | KP719472                                                                                                                                                                                                                                                                                                                                   |
|                                 | Doukakis et al. (2011)              | HQ171612 and HQ171613                                                                                                                                                                                                                                                                                                                      |
|                                 | Haque et al. (2019)                 | MH841980, MH841984, MH841992, MH841997, MH842005, MH842006 and MH842008                                                                                                                                                                                                                                                                    |
|                                 | Jabado et al. (2015a)               | KM973111–KM973115                                                                                                                                                                                                                                                                                                                          |
|                                 | Jabado et al. (2015b)               | KP193152, KP193155, KP193158, KP193162, KP193166, KP193169, KP193172, KP193177, KP193179, KP193192, KP193194, KP193218, KP193222, KP193224, KP193230, KP193244, KP193246, KP193247, KP193249, KP193250, KP193253, KP193321, KP193348, KP193380, KP193383, KP193392, KP193407, KP193422, KP193422 KP193431, KP193432, KP193434 and KP193442 |
|                                 | Khalil et al. (2015)*               | KU366634                                                                                                                                                                                                                                                                                                                                   |
|                                 | Noorul-Azliana and Wahidah, (2017)* | MG644325                                                                                                                                                                                                                                                                                                                                   |
|                                 | Sembiring et al. (2015)             | KF590340                                                                                                                                                                                                                                                                                                                                   |
|                                 | Spaet and Berumen (2015)            | KM396937                                                                                                                                                                                                                                                                                                                                   |
|                                 | Steinke et al. (2015)               | JF493045–JF493048                                                                                                                                                                                                                                                                                                                          |
|                                 | Wainwright et al. (2018)            | MH243193                                                                                                                                                                                                                                                                                                                                   |
|                                 | Ward et al. (2008)                  | EU398599, EU398600                                                                                                                                                                                                                                                                                                                         |
|                                 | Wong et al. (2009)                  | FJ519053–FJ519056                                                                                                                                                                                                                                                                                                                          |
|                                 | Zacharia et al. (2016)*             | KX063634                                                                                                                                                                                                                                                                                                                                   |

|                                |                                    |                                                                                                                                                                                                                                                                                                                        |
|--------------------------------|------------------------------------|------------------------------------------------------------------------------------------------------------------------------------------------------------------------------------------------------------------------------------------------------------------------------------------------------------------------|
|                                | Zemlak et al. (2009)               | DQ885075, DQ885076 and DQ884978                                                                                                                                                                                                                                                                                        |
| <i>Carcharhinus brevipinna</i> | Aguilar et al. (2020)*             | MT456076, MT455809, MT455794, MT455455, MT455450, MT455293, MT455246, MT455095 and MT455080                                                                                                                                                                                                                            |
|                                | Appleyard et al. (2018)            | MF508673                                                                                                                                                                                                                                                                                                               |
|                                | Bineesh et al. (2016)              | KF899797–KF899801                                                                                                                                                                                                                                                                                                      |
|                                | Chuang et al. (2016)               | KP719473–KP719475                                                                                                                                                                                                                                                                                                      |
|                                | Deeds et al. (2014)                | KF461149                                                                                                                                                                                                                                                                                                               |
|                                | Doukakis et al. (2011)             | HQ171614–HQ171641                                                                                                                                                                                                                                                                                                      |
|                                | Haque et al. (2019)                | MH841978                                                                                                                                                                                                                                                                                                               |
|                                | Jabado et al. (2015b)              | KP193451, KP193433, KP193424, KP193378, KP193374, KP193368, KP193359, KP193354, KP193346, KP193338, KP193336, KP193332, KP193327, KP193324, KP193313, KP193311, KP193307, KP193294, KP193283, KP193270, KP193267, KP193241, KP193235, KP193216, KP193198, KP193196, KP193174, KP193171, KP193144 and KM973097–KM973101 |
|                                | Jamaludin and Mohd-Arshaad (2017)* | MG594062, MG594055 and MG594049                                                                                                                                                                                                                                                                                        |
|                                | Kumar et al. (2015)                | KC175450                                                                                                                                                                                                                                                                                                               |
|                                | Liu et al. (2013)                  | KF606833                                                                                                                                                                                                                                                                                                               |
|                                | Moore et al. (2012)                | JN989309                                                                                                                                                                                                                                                                                                               |
|                                | Noorul-Azliana and Wahidah (2017)* | MG644347, MG644275–MG644277                                                                                                                                                                                                                                                                                            |
|                                | Semberring et al. (2017)           | KF793760, KF793745, KF590405, KF590390, KF590386, KF590342, KF590293, KF590282 and KC840954                                                                                                                                                                                                                            |
|                                | Spaet and Berumen (2015)           | KM396945                                                                                                                                                                                                                                                                                                               |
|                                | Steinke et al. (2015)              | JF493053–JF493059 and GU804990                                                                                                                                                                                                                                                                                         |
|                                | Wainwright et al. (2018)           | MH243095, MH243105, MH243150, MH243168, MH243174, MH243176, and MH243178                                                                                                                                                                                                                                               |

|                                        |                                        |                                                                                                                                                                                                                                                                                                                                                 |
|----------------------------------------|----------------------------------------|-------------------------------------------------------------------------------------------------------------------------------------------------------------------------------------------------------------------------------------------------------------------------------------------------------------------------------------------------|
|                                        | Ward et al. (2008)                     | EU398603–EU398601                                                                                                                                                                                                                                                                                                                               |
|                                        | Wong et al. (2009)                     | FJ519606 and FJ519062-FJ519070                                                                                                                                                                                                                                                                                                                  |
|                                        | Zacharia et al. (2016)*                | KX063635                                                                                                                                                                                                                                                                                                                                        |
| <b><i>Carcharhinus dussumieri</i></b>  | International Barcode of Life (2010) * | GU673375, GU673386, GU673579 and GU673585                                                                                                                                                                                                                                                                                                       |
|                                        | Jabado et al. (2015a)                  | KM973102–KM973106                                                                                                                                                                                                                                                                                                                               |
|                                        | Ward et al. (2005)                     | DQ108301                                                                                                                                                                                                                                                                                                                                        |
|                                        | Ward et al. (2008)                     | EU398608–EU398610                                                                                                                                                                                                                                                                                                                               |
|                                        | Wong et al. (2009)                     | FJ519072–FJ519078                                                                                                                                                                                                                                                                                                                               |
| <b><i>Carcharhinus falciformis</i></b> | Almanza et al. (2014)                  | KM987408–KM987411                                                                                                                                                                                                                                                                                                                               |
|                                        | Appleyard et al. (2018)                | MF508674–MF508677                                                                                                                                                                                                                                                                                                                               |
|                                        | Bineesh et al. (2016)                  | KF899803–KF899807                                                                                                                                                                                                                                                                                                                               |
|                                        | Camacho and Moreno (2018)              | MG837900–MG837909                                                                                                                                                                                                                                                                                                                               |
|                                        | Jabado et al. (2015a)                  | KM973147–KM973148                                                                                                                                                                                                                                                                                                                               |
|                                        | Jabado et al. (2015b)                  | KP193153, KP193184, KP193208, KP193233, KP193304, KP193314, KP193326, KP193375, KP193386, KP193449 and KP193452                                                                                                                                                                                                                                 |
|                                        | Johri et al. (2019)                    | MK092088                                                                                                                                                                                                                                                                                                                                        |
|                                        | Sembiring et al. (2015)                | KF590281, KF590283, KF590292, KF590294-KF590301, KF590303, KF590304, KF590324–KF590326, KF590344, KF590345, KF590362–KF590373, KF590392, KF590411, KF590423–KF590426, KF590428, KF590429, KF590456, KF590484–KF590486, KF590491–KF590494, KF590497, KF590498, KF590505, KF590511, KF590515, KF793743, KF793756, KF793759, KC840952 and KC840953 |
|                                        | da Silva Ferrette et al. (2019)        | MH719952, MH719954–MH719956, MH719958, MH719960, MH719965, MH719977 and MH719978                                                                                                                                                                                                                                                                |
|                                        | Wainwright et al. (2018)               | MH243106, MH243156-MH243159, MH243170, MH243172, MH243177, MH243180–MH243182 and MH243225                                                                                                                                                                                                                                                       |

|                              |                                 |                                                                                                                                                                                                                                                                                                                                                                    |
|------------------------------|---------------------------------|--------------------------------------------------------------------------------------------------------------------------------------------------------------------------------------------------------------------------------------------------------------------------------------------------------------------------------------------------------------------|
|                              | Ward et al. (2008)              | EU398611–EU398614                                                                                                                                                                                                                                                                                                                                                  |
|                              | Wong et al. (2009)              | FJ519079–FJ519086, FJ519088                                                                                                                                                                                                                                                                                                                                        |
| <i>Carcharhinus leucas</i>   | Bineesh et al. (2016)           | KF899803–KF899807                                                                                                                                                                                                                                                                                                                                                  |
|                              | Camacho and Moreno (2018)       | MG837900–MG837909                                                                                                                                                                                                                                                                                                                                                  |
|                              | Jabado et al. (2015a)           | KM973147–KM973148                                                                                                                                                                                                                                                                                                                                                  |
|                              | Jabado et al. (2015b)           | KP193153, KP193184, KP193208, KP193233, KP193304, KP193314, KP193326, KP193375, KP193386, KP193449 and KP193452                                                                                                                                                                                                                                                    |
|                              | Johri et al. (2019)             | MK092088                                                                                                                                                                                                                                                                                                                                                           |
|                              | Sembiring et al. (2015)         | KF590281, KF590283, KF590292, KF590294–KF590301, KF590303, KF590304, KF590324–KF590326, KF590344, KF590345, KF590362–KF590373, KF590392, KF590411, KF590423–KF590426, KF590428, KF590429, KF590456, KF590484–KF590486, KF590491–KF590494, KF590497, KF590498, KF590505, KF590511, KF590515, KF793743, KF793756, KF793759, KC840952, KC840953 and JF493060–JF493063 |
|                              | da Silva Ferrette et al. (2019) | MH719952, MH719954–MH719956, MH719958, MH719960, MH719965, MH719977 and MH719978                                                                                                                                                                                                                                                                                   |
|                              | Wainwright et al. (2018)        | MH243106, MH243156–MH243159, MH243170, MH243172, MH243177, MH243180–MH243182, MH243184, MH243185, MH243187 and MH243225                                                                                                                                                                                                                                            |
|                              | Ward et al. (2008)              | EU398616, EU398617, EU398619, EU398618 and EU398611–EU398614                                                                                                                                                                                                                                                                                                       |
|                              | Wong et al. (2009)              | FJ518999, FJ519000–FJ519009, FJ519079–FJ519086, FJ519088 and FJ519106–FJ519109                                                                                                                                                                                                                                                                                     |
|                              | Wynen et al. (2009)             | EU818710                                                                                                                                                                                                                                                                                                                                                           |
| <i>Carcharhinus limbatus</i> | Aguilar et al. (2020)*          | MT455925 and MT456066                                                                                                                                                                                                                                                                                                                                              |
|                              | Appleyard et al. (2018)         | MF508680                                                                                                                                                                                                                                                                                                                                                           |
|                              | Bineesh et al. (2016)           | KF899813–KF899816                                                                                                                                                                                                                                                                                                                                                  |
|                              | Doukakis et al. (2011)          | HQ171642                                                                                                                                                                                                                                                                                                                                                           |
|                              | Feitosa et al. (2018)           | MF686570                                                                                                                                                                                                                                                                                                                                                           |



|                                        |                                                                                                                         |
|----------------------------------------|-------------------------------------------------------------------------------------------------------------------------|
| Handy et al. (2013)                    | KF461152                                                                                                                |
| International Barcode of Life (2011) * | JN313301                                                                                                                |
| Jabado et al. (2015a)                  | KM973118–KM973122                                                                                                       |
| Jabado et al. (2015b)                  | KP193156, KP193190, KP193193, KP193195, KP193274 and KP193401                                                           |
| Lakra et al. (2011)                    | FJ237542 and FJ237543                                                                                                   |
| Moore et al. (2011)                    | JN082186–JN082188                                                                                                       |
| Moore et al. (2012)                    | JN989310                                                                                                                |
| Noorul-Azliana and Wahidah (2017)*     | MG644311 and MG644365                                                                                                   |
| Ovenden et al. (2010)                  | GQ227280–GQ227282                                                                                                       |
| Persis et al. (2009)                   | EU541307                                                                                                                |
| Ribeiro et al. (2012)                  | JQ365259–JQ365263                                                                                                       |
| Sembiring et al. (2015)                | KF590251, KF590257, KF590259–KF590263, KF590291, KF590382, KF590500, KF590506, KF793730–KF793732, KF793747 and KF793748 |
| da Silva Ferrette et al. (2019)        | MH911050 and MH911051                                                                                                   |
| Spaet and Berumen (2015)               | KM396943                                                                                                                |
| Steinke et al. (2015)                  | JF493064 and JF493065                                                                                                   |
| Ward et al. (2008)                     | EU398620–EU398625                                                                                                       |
| Wong et al. (2009)                     | FJ519110–FJ519116 and FJ519613–FJ519616                                                                                 |
| Zemlak et al. (2009)                   | DQ884979–DQ884981                                                                                                       |
| <hr/> <i>Carcharhinus longimanus</i>   |                                                                                                                         |
| Bineesh et al. (2016)                  | KF913239 and KF913240–KF913242                                                                                          |
| Hastings and Burton (2010)*            | GU440259                                                                                                                |
| Jabado et al. (2015a)                  | KM973123–KM973126                                                                                                       |
| Jabado et al. (2015b)                  | KP193281                                                                                                                |
| Moore et al. (2012)                    | JN989311                                                                                                                |
| Sembiring et al. (2015)                | KF590242, KF590246, KF590412, KF590413, KF590427, KF590501, KF590504 and KF793726                                       |
| Ward et al. (2007)                     | EF609312                                                                                                                |

|                                  |                                       |                                                                                                                                                         |
|----------------------------------|---------------------------------------|---------------------------------------------------------------------------------------------------------------------------------------------------------|
|                                  | Ward et al. (2008)                    | EU398627–EU398629                                                                                                                                       |
|                                  | Wong et al. (2009)                    | FJ518919–FJ518928, FJ519117–FJ519119, FJ519368 and FJ519617–FJ519620                                                                                    |
| <i>Carcharhinus macloti</i>      | Bineesh et al. (2016)                 | KF913239–KF913242                                                                                                                                       |
|                                  | Jabado et al. (2015)                  | KM973123–KM973126                                                                                                                                       |
|                                  | Moore et al. (2012)                   | JN989311                                                                                                                                                |
|                                  | Ward et al. (2007)                    | EF609312                                                                                                                                                |
|                                  | Ward et al. (2008)                    | EU398628 and EU398629                                                                                                                                   |
| <i>Carcharhinus melanopterus</i> | Appleyard et al. (2018)               | MF508681                                                                                                                                                |
|                                  | Bineesh et al. (2016)                 | KF899824, KF899823 and MK422108                                                                                                                         |
|                                  | Hubert et al. (2012)                  | JQ431553                                                                                                                                                |
|                                  | International Barcode of Life (2010)* | HM387141                                                                                                                                                |
|                                  | International Barcode of Life (2011)* | JN313260 and JN313261                                                                                                                                   |
|                                  | Jabado et al. (2015a)                 | KM973092–KM973096                                                                                                                                       |
|                                  | Jabado et al. (2015b)                 | KP193207, KP193215, KP193231, KP193236, KP193260, KP193341, KP193362, KP193371, KP193410, KP193413, KP193418, KP193421, KP193443, KP193453 and KP193157 |
|                                  | Moore et al. (2011)                   | JN082189 and JN082190                                                                                                                                   |
|                                  | Segura-Garcia and Yain Tun (2018)*    | MH235615                                                                                                                                                |
|                                  | Sembiring et al. (2015)               | KF590379, KF590380, KF590383, KF590389, KF793769 and KF793772                                                                                           |
|                                  | Spaet and Berumen (2015)              | KM396936                                                                                                                                                |
|                                  | Wainwright et al. (2018)              | MH243165 and MH243191                                                                                                                                   |
|                                  | Ward et al. (2007)                    | EF609313                                                                                                                                                |
|                                  | Ward et al. (2008)                    | EU398630–EU398633                                                                                                                                       |
|                                  | Wong et al. (2009)                    | FJ519120–FJ519127                                                                                                                                       |

|                              |                                       |                                                                                                                                                         |
|------------------------------|---------------------------------------|---------------------------------------------------------------------------------------------------------------------------------------------------------|
| <i>Carcharhinus plumbeus</i> | Aguilar et al. (2020)*                | MT455294, MT455848, MT455995, MT456051 and MT456060                                                                                                     |
|                              | Appleyard et al. (2018)               | MF508682                                                                                                                                                |
|                              | Chuang et al. (2016)                  | KP719303 and KP719304                                                                                                                                   |
|                              | Doukakis et al. (2011)                | HQ171649–HQ171652                                                                                                                                       |
|                              | Jabado et al. (2015a)                 | KM973127–KM973131                                                                                                                                       |
|                              | Jabado et al. (2015b)                 | KP193149, KP193151, KP193178, KP193189, KP193191, KP193206, KP193212, KP193229, KP193279, KP193286, KP193317, KP193365, KP193369, KP193403 and KP193409 |
|                              | Sembiring et al. (2015)               | KF590222, KF590225 and KF590227                                                                                                                         |
|                              | Spaet and Berumen (2015)              | KM396951                                                                                                                                                |
|                              | Steinke et al. (2015)                 | JF493067–JF493070                                                                                                                                       |
|                              | Ward et al. (2008)                    | EU398638 and EU398639                                                                                                                                   |
|                              | Wong et al. (2009)                    | FJ519152–FJ519156 and FJ519623                                                                                                                          |
| <i>Carcharhinus sealei</i>   | Bineesh et al. (2016)                 | MG644363, MK422103 and MK422104–MK422106                                                                                                                |
|                              | Sembiring et al. (2015)               | KF590375–KF590378, KF590393, KF590395 and KF793767                                                                                                      |
|                              | Wainwright et al. (2018)              | MH243171                                                                                                                                                |
|                              | Ward et al. (2008)                    | EU398640–EU398644                                                                                                                                       |
| <i>Carcharhinus sorrah</i>   | Appleyard et al. (2018)               | MF508683                                                                                                                                                |
|                              | Ahmed et al. (2021)                   | MH429287 and MH429296                                                                                                                                   |
|                              | Bineesh et al. (2016)                 | KF899817–KF899822                                                                                                                                       |
|                              | Chuang et al. (2016)                  | KP719305, KP719603, KP719611 and KP719830                                                                                                               |
|                              | Doukakis et al. (2011)                | HQ171653–HQ171667                                                                                                                                       |
|                              | Haque et al. (2019)                   | MH841979, MH841999 and MH842000                                                                                                                         |
|                              | International Barcode of Life (2010)* | JN313264                                                                                                                                                |
|                              | Jabado et al. (2015a)                 | KM973132–KM973136                                                                                                                                       |

|                                       |                                                                                                                                                                                                                                                                                                                                                                                                       |
|---------------------------------------|-------------------------------------------------------------------------------------------------------------------------------------------------------------------------------------------------------------------------------------------------------------------------------------------------------------------------------------------------------------------------------------------------------|
| Jabado et al. (2015b)                 | KP193145, KP193147, KP193161, KP193163, KP193164, KP19317, KP193180–KP193182, KP193221, KP193225, KP193232, KP193234, KP193239, KP193245, KP193248, KP193254, KP193259, KP193265, KP193268, KP193271, KP193275, KP193284, KP193288, KP193290, KP193295, KP193308, KP193315, KP193325, KP193351, KP193364, KP193366, KP193372, KP193388, KP193391, KP193398, KP193412, KP193423, KP193435 and KP193448 |
| Khalil et al. (2015)*                 | KU366614, KU366624, KU366628 and KU366630                                                                                                                                                                                                                                                                                                                                                             |
| Kumar et al. (2013)                   | JX978335                                                                                                                                                                                                                                                                                                                                                                                              |
| Moore et al. (2011)                   | JN082191 and JN034904                                                                                                                                                                                                                                                                                                                                                                                 |
| Sembiring et al. (2015)               | KF590258, KF590268, KF590269, KF590343, KF590356, KF590357, KF590384, KF590440, KF590442–KF590444, KF590458, KF793728, KF793746, KF793761, KF793763, KF793764 and KC840949–KC840951                                                                                                                                                                                                                   |
| Spaet and Berumen (2015)              | KM396941                                                                                                                                                                                                                                                                                                                                                                                              |
| Wainwright et al. (2018)              | MH243104, MH243173, MH243129, MH243198, MH243206, MH243208, MH243212 and MH243221                                                                                                                                                                                                                                                                                                                     |
| Ward et al. (2008)                    | EU398645                                                                                                                                                                                                                                                                                                                                                                                              |
| Wong et al. (2009)                    | FJ519167–FJ519172                                                                                                                                                                                                                                                                                                                                                                                     |
| Zacharia et al. (2016)*               | KX063636                                                                                                                                                                                                                                                                                                                                                                                              |
| <i>Carcharodon carcharias</i>         |                                                                                                                                                                                                                                                                                                                                                                                                       |
| Hastings and Burton (2010)*           | GU440260                                                                                                                                                                                                                                                                                                                                                                                              |
| Iglesia et al. (2014)                 | KM212005                                                                                                                                                                                                                                                                                                                                                                                              |
| International Barcode of Life (2011)* | JN312956                                                                                                                                                                                                                                                                                                                                                                                              |
| Keskin (2010)*                        | HQ167639                                                                                                                                                                                                                                                                                                                                                                                              |
| Steinke et al. (2015)                 | JF493076                                                                                                                                                                                                                                                                                                                                                                                              |
| Vella et al. (2017)                   | KY909355                                                                                                                                                                                                                                                                                                                                                                                              |
| Ward et al. (2005)                    | DQ108328                                                                                                                                                                                                                                                                                                                                                                                              |
| Ward et al. (2008)                    | FJ518939–FJ518944 and EU398646                                                                                                                                                                                                                                                                                                                                                                        |
| Yokes (2016)*                         | KY176701                                                                                                                                                                                                                                                                                                                                                                                              |

|                                |                                       |                                                            |
|--------------------------------|---------------------------------------|------------------------------------------------------------|
|                                | Zemlak et al. (2009)                  | DQ884985–DQ884987                                          |
| <i>Carcharias taurus</i>       | Aguilar et al. (2020)*                | MT455256 and MT456108                                      |
|                                | Jabado et al. (2015a)                 | KM973199                                                   |
|                                | Keskin (2010)*                        | HQ167637                                                   |
|                                | Momigliano et al. (2015)              | KR003980–KR003983                                          |
|                                | Steinke et al. (2015)                 | JF493071–JF493075                                          |
|                                | Wong et al. (2009)                    | FJ519624 and FJ519628–FJ519699                             |
| <i>Cetorhinus maximus</i>      | Cariani et al. (2017)                 | KT307166–KT307170                                          |
|                                | Keskin (2010)*                        | HQ167642                                                   |
|                                | Wong et al. (2009)                    | FJ519292–FJ519322, FJ519325–FJ519328 and FJ519335–FJ519339 |
|                                | Yokes (2016)*                         | KY176425 and KY176702                                      |
| <i>Chiloscyllium griseum</i>   | Bamaniya et al. (2016)*               | KJ093271–KJ093276                                          |
|                                | Bineesh et al. (2016)                 | KF899625–KF899628                                          |
|                                | Kumar et al. (2015)                   | KC175451                                                   |
|                                | Steinke et al. (2009)                 | FJ583140 and FJ583141                                      |
| <i>Chiloscyllium indicum</i>   | Ward et al. (2008)                    | EF609325 and EU398680–EU398692                             |
| <i>Chiloscyllium punctatum</i> | International Barcode of Life (2011)* | HQ955999, HQ956000 and JN313263                            |
|                                | Segura-Garcia and Yain Tun (2018)*    | MH235621                                                   |
|                                | Steinke et al. (2009)                 | FJ583142–FJ583144                                          |
|                                | Ward et al. (2007)                    | EF609326                                                   |
|                                | Ward et al. (2008)                    | EU398697–EU398707                                          |
| <i>Galeocerdo cuvier</i>       | Aguilar et al. (2020)*                | MT455235, MT455562 and MT455748                            |
|                                | Ahmed et al. (2021)                   | MN013428 and MH429290                                      |
|                                | Appleyard et al. (2018)               | MF508685                                                   |
|                                | Bineesh et al. (2016)                 | KF899429–KF899436, HM239674                                |
|                                | Chuang et al. (2016)                  | KP719330, KP719613 and KP719614                            |

|                                 |                                                                                                                                                         |
|---------------------------------|---------------------------------------------------------------------------------------------------------------------------------------------------------|
| da Silva Ferrette et al. (2019) | MH911009–MH911011                                                                                                                                       |
| Deepak et al. (2011)*           | JN657190                                                                                                                                                |
| Doukakis et al. (2011)          | HQ171668–HQ171676                                                                                                                                       |
| Feitosa et al. (2018)           | MF686571 and MF686584                                                                                                                                   |
| Haque et al. (2019)             | MH841986                                                                                                                                                |
| Jabado et al. (2015a)           | KM973198                                                                                                                                                |
| Jabado et al. (2015b)           | KP193148, KP193160, KP193187, KP193200, KP193205, KP193214, KP193261, KP193262, KP193289, KP193309, KP193329, KP193349, KP193367, KP193370 and KP193385 |
| Liu et al. (2013)               | KF606776 and KF606778                                                                                                                                   |
| Pirog (2019)                    | MK359168–MK359171                                                                                                                                       |
| Sarmiento-Camacho et al. (2018) | MG837930–MG837933                                                                                                                                       |
| Sembiring et al. (2015)         | KF590290 and KF590299                                                                                                                                   |
| Spaet and Berumen (2015)        | KM396946                                                                                                                                                |
| Vysakh (2019)*                  | MN017113                                                                                                                                                |
| Wainwright et al. (2018)        | MH243175, MH243201, MH243219 and MH243228                                                                                                               |
| Ward et al. (2008)              | EU398785–EU398788                                                                                                                                       |
| Wong et al. (2009)              | FJ519801–FJ519959                                                                                                                                       |
| Zacharia et al. (2014)*         | KJ475202                                                                                                                                                |
| Zemlak et al. (2009)            | DQ885011–DQ885013, DQ885091 and DQ885091                                                                                                                |
| <hr/> <i>Isurus oxyrinchus</i>  |                                                                                                                                                         |
| Aguilar et al. (2020)*          | MT456007                                                                                                                                                |
| Barbuto et al. (2010)           | FM164462, FM164463, FM164465, FM164467, FM164468, FM164470, FM164473, FM164474 and FM164475                                                             |
| Bengil et al. (2019)            | KY290584 and MG214784                                                                                                                                   |
| Bineesh et al., (2016)          | KF899536–KF899541                                                                                                                                       |
| Chuang et al. (2016)            | KP719234–KP719246                                                                                                                                       |

|                                 |                                                                                                                                                                                                                                                                                                                                                                 |
|---------------------------------|-----------------------------------------------------------------------------------------------------------------------------------------------------------------------------------------------------------------------------------------------------------------------------------------------------------------------------------------------------------------|
| da Silva Ferrette et al. (2019) | MH911342–MH911346, MH194507, MH719959, MH719963, MH719966 and MH719979                                                                                                                                                                                                                                                                                          |
| de Carvalho (2014)              | KF771232                                                                                                                                                                                                                                                                                                                                                        |
| Jabado et al. (2015b)           | KP193143, KP193150, KP193176, KP193183, KP193197, KP193203, KP193204, KP193209, KP193213, KP193240, KP193251. KP193255, KP193258. KP193266, KP193291, KP193303, KP193330, KP193331, KP193347, KP193352, KP193353, KP193373, KP193377, KP193379, KP193384, KP193387, KP193389, KP193390, KP193395, KP193396, KP193402, KP193427, KP193430, KP193439 and KP193440 |
| Keskin (2010)*                  | HQ167640                                                                                                                                                                                                                                                                                                                                                        |
| Kumar et al. (2015)             | JX978337                                                                                                                                                                                                                                                                                                                                                        |
| McCusker et al. (2013)          | KC015501 and KC015502                                                                                                                                                                                                                                                                                                                                           |
| Ribeiro et al. (2012)           | JX124792 and JX034003–JX034006                                                                                                                                                                                                                                                                                                                                  |
| Sembiring et al. (2015)         | KF590247, KF590279, KF590306, KF590307, KF590330, KF590336, KF590338, KF590339, KF590381, KF590420, KF590421, KF590422, KF590437, KF590438. KF793721 and KF793722                                                                                                                                                                                               |
| Steinke et al. (2015)           | JF493694–JF493697                                                                                                                                                                                                                                                                                                                                               |
| Townsend and McCracken (2015)   | KT444008                                                                                                                                                                                                                                                                                                                                                        |
| Velez-Zuazo et al. (2015)       | KJ146030–KJ146038                                                                                                                                                                                                                                                                                                                                               |
| Vella et al. (2017)             | KY909421–KY909429                                                                                                                                                                                                                                                                                                                                               |
| Ward et al. (2008)              | EU398889–EU398898 and EU869822                                                                                                                                                                                                                                                                                                                                  |
| Wong et al. (2009)              | FJ518945–FJ518952 and FJ519206–FJ519210                                                                                                                                                                                                                                                                                                                         |
| Zacharia et al. (2016)*         | KX063638                                                                                                                                                                                                                                                                                                                                                        |
| <hr/>                           |                                                                                                                                                                                                                                                                                                                                                                 |
| <i>Isurus paucus</i>            |                                                                                                                                                                                                                                                                                                                                                                 |
| Bineesh et al., (2016)          | KF899542–KF899544                                                                                                                                                                                                                                                                                                                                               |
| Chuang et al. (2016)            | KP719247                                                                                                                                                                                                                                                                                                                                                        |
| da Silva Ferrette et al. (2019) | MH911336–MH911341, MH719923–MH719928, MH719928, MH719931, MH719932, MH719939, MH719940, MH719964 and MH719976                                                                                                                                                                                                                                                   |

|                               |                                       |                                                                                                                                                                             |
|-------------------------------|---------------------------------------|-----------------------------------------------------------------------------------------------------------------------------------------------------------------------------|
|                               | Sembiring et al. (2015)               | KF590434–KF590436, KF590460, KF590464, KF590468, KF590472, KF590474, KF590478, KF590495 and KF590496                                                                        |
|                               | Ward et al. (2008)                    | EU398899 and EU398900                                                                                                                                                       |
|                               | Wong et al. (2009)                    | FJ519010, FJ519012–FJ519019 and FJ519627–FJ519629                                                                                                                           |
| <i>Lamna ditropis</i>         | Elz et al. (2013)                     | KF918878                                                                                                                                                                    |
|                               | Mecklenburg et al. (2011)             | HQ712511                                                                                                                                                                    |
|                               | Wong et al. (2009)                    | FJ519020–FJ519031                                                                                                                                                           |
|                               | Zhang and Hanner (2011)               | JF952773                                                                                                                                                                    |
| <i>Lamna nasus</i>            | Keskin (2010)*                        | HQ167641                                                                                                                                                                    |
|                               | Velez-Zuazo et al. (2015)             | KJ146039–KJ146041                                                                                                                                                           |
|                               | Wong et al. (2009)                    | FJ519648–FJ519724                                                                                                                                                           |
| <i>Negaprion acutidens</i>    | Appleyard et al. (2018)               | MF508686 and MF508686                                                                                                                                                       |
|                               | International Barcode of Life (2010)* | GU674232                                                                                                                                                                    |
|                               | Jabado et al. (2015a)                 | KM973164 and KM973165                                                                                                                                                       |
|                               | Jabado et al. (2015b)                 | KP193167, KP193186, KP193199, KP193211, KP193243, KP193280, KP193293, KP193300, KP193318, KP193320, KP193323, KP193406, KP193428, KP193437, KP193428, KP193437 and KP193438 |
|                               | Spaet and Berumen (2015)              | KM396935                                                                                                                                                                    |
|                               | Ward et al. (2005)                    | DQ108284                                                                                                                                                                    |
|                               | Ward et al. (2008)                    | EU398935–EU398940                                                                                                                                                           |
|                               | Wong et al. (2009)                    | FJ519224–FJ519225                                                                                                                                                           |
| <i>Negaprion brevirostris</i> | Wong et al. (2009)                    | FJ519226–FJ519235 and FJ519631                                                                                                                                              |
| <i>Prionace glauca</i>        | Almerón et al. (2018)                 | MG703523–MG703531, MG703533, MG703534 and MG703536                                                                                                                          |
|                               | Barbuto et al. (2010)                 | FM164482, FM164428, FM164458 and FM164459                                                                                                                                   |
|                               | Bénard-Capelle et al. (2015)          | KP975821–KP975822                                                                                                                                                           |
|                               | Bineesh et al. (2016)                 | KF899650–KF899653                                                                                                                                                           |



|                                       |                                                                                                                                                                                                                                                                             |
|---------------------------------------|-----------------------------------------------------------------------------------------------------------------------------------------------------------------------------------------------------------------------------------------------------------------------------|
| Cariani et al. (2017)                 | KT307365 and KT307366                                                                                                                                                                                                                                                       |
| Chuang et al. (2016)                  | KP719342, KP719343 and KP719345–KP719450                                                                                                                                                                                                                                    |
| da Silva Ferrette et al. (2019)       | MH911185–MH911253 and MH719774–MH719984                                                                                                                                                                                                                                     |
| Ferrito et al. (2019)                 | MN447694–MN447697                                                                                                                                                                                                                                                           |
| Giovos et al. (2020)                  | MN641758, MN641761, MN641763, MN641766, MN641769, MN641770, MN641777, MN641781, MN641784, MN641785, MN641788, MN641789, MN641798, MN641799, MN641800 and MN641801                                                                                                           |
| Gkafas et al. (2015)                  | KP192409                                                                                                                                                                                                                                                                    |
| Hastings and Burton (2008)*           | EU400175                                                                                                                                                                                                                                                                    |
| International Barcode of Life (2011)* | JN312503–JN312505                                                                                                                                                                                                                                                           |
| Jabado et al. (2015b)                 | KP193159, KP193306, KP193339, KP193350, KP193446 and KP193455                                                                                                                                                                                                               |
| Liu et al. (2013)                     | KF606771, KF606774, KF606779, KF606788, KF606807, KF606817, KF606823, KF606830, KF606846 and KF606857                                                                                                                                                                       |
| Marín et al. (2018)                   | MH194440, MH194441, MH194480, MH194481, and MH194484                                                                                                                                                                                                                        |
| McCuster et al. (2013)                | KC015829–KC015834                                                                                                                                                                                                                                                           |
| Nicolé et al. (2011)                  | GU324182                                                                                                                                                                                                                                                                    |
| Oliveira et al. (2016)                | KX586223–KX586225                                                                                                                                                                                                                                                           |
| Sembiring et al. (2015)               | KF590231–KF590241, KF590244, KF590245, KF590280, KF590302, KF590459, KF590461 –KF590463, KF590465 - KF590467, KF590470, KF590471, KF590473, KF590475–KF590477, KF590479–KF590482, KF793717–KF793720, KF793723–KF793725, KF793727, KF793750, KF793751, KF793758 and KF793771 |
| Velez-Zuazo et al. (2013)             | KJ146042–KJ146044                                                                                                                                                                                                                                                           |
| Vella et al. (2017)                   | KY909463–KY909469                                                                                                                                                                                                                                                           |
| Wainwright et al. (2018)              | MH243131–MH243139, MH243143, MH243144, MH243160, MH243163 and MH243166                                                                                                                                                                                                      |

|                                        |                             |                                                                                                         |
|----------------------------------------|-----------------------------|---------------------------------------------------------------------------------------------------------|
|                                        | Ward et al. (2005)          | DQ108286, DQ108288 and DQ108289                                                                         |
|                                        | Ward et al.,(2008)          | EU869837                                                                                                |
|                                        | Wong et al. (2009)          | FJ518955–FJ518963, FJ519237–FJ519243, FJ519632 and FJ519633                                             |
|                                        | Yokes (2016)*               | KY176584                                                                                                |
| <b><i>Rhincodon typus</i></b>          | Bineesh et al. (2016)       | KF899632–KF899634                                                                                       |
|                                        | Haque et al. (2019)         | MH842010                                                                                                |
|                                        | Hastings and Burton (2010)* | GU440502                                                                                                |
|                                        | Jabado et al. (2015a)       | KM973184                                                                                                |
|                                        | Marín et al. (2018)         | MH194467                                                                                                |
|                                        | Steinke et al. (2015)       | HQ945887–HQ945889                                                                                       |
|                                        | Toha et al. (2020)          | MN759737–MN759764                                                                                       |
|                                        | Ward et al. (2008)          | EU398993                                                                                                |
|                                        | Wong et al. (2009)          | FJ519244–FJ519252                                                                                       |
| <b><i>Rhizoprionodon acutus</i></b>    | Bineesh et al. (2016)       | KF899684–KF899688 and MK422110                                                                          |
|                                        | Doukakis et al. (2011)      | HQ171695–HQ171734                                                                                       |
|                                        | Jabado et al. (2015a)       | KM973176, KM973178 and KM973180                                                                         |
|                                        | Kumar et al. (2015)         | JX978338                                                                                                |
|                                        | Sembiring et al. (2015)     | KF590219, KF590220, KF590223, KF590229, KF590256, KF590264–<br>KF590267, KF793733–KF793737 and KF793749 |
|                                        | Spaet and Berumen (2015)    | KM396933                                                                                                |
|                                        | Wainwright et al. (2018)    | MH243103 and MH243140                                                                                   |
|                                        | Ward et al. (2005)          | DQ108275–DQ108278 and DQ108290                                                                          |
|                                        | Wong et al. (2009)          | FJ519253                                                                                                |
| <b><i>Rhizoprionodon oligolinx</i></b> | Andriyono et al. (2020)     | MH085756                                                                                                |
|                                        | Jabado et al. (2015a)       | KM973185–KM973188                                                                                       |

|                             |                                        |                                                                                                                                                                                                                               |
|-----------------------------|----------------------------------------|-------------------------------------------------------------------------------------------------------------------------------------------------------------------------------------------------------------------------------|
|                             | Wainwright et al. (2018)               | MH429294, MH429295, MH311279, MH311281, MH311285, MH243096, MH243142, MH243149, MH243151 and MH243154                                                                                                                         |
| <i>Scoliodon laticaudus</i> | Ahmed et al. (2021)                    | MH230956, MH429292 MH087056 and MH087057                                                                                                                                                                                      |
|                             | Bineesh et al. (2016)                  | KF899694–KF899700                                                                                                                                                                                                             |
|                             | Habib et al. (2019)*                   | MN458374                                                                                                                                                                                                                      |
|                             | Haque et al. (2019)                    | MH841994                                                                                                                                                                                                                      |
|                             | International Barcode of Life (2011) * | HQ956149                                                                                                                                                                                                                      |
|                             | Kumar et al. (2015)                    | JX978326–JX978328 and KC175448                                                                                                                                                                                                |
|                             | Wainwright et al. (2018)               | MH243114–MH243122                                                                                                                                                                                                             |
| <i>Sphyrna lewini</i>       | Aguilar et al. (2020)*                 | MT455337, MT455567 and MT456041                                                                                                                                                                                               |
|                             | Ahmed et al. (2021)                    | MH230949, MH429288 and MH429289                                                                                                                                                                                               |
|                             | Alghozali et al. (2019)                | LC422406–LC422410                                                                                                                                                                                                             |
|                             | Appleyard et al. (2018)                | MF508689–MF508691                                                                                                                                                                                                             |
|                             | Bineesh et al. (2016)                  | KF899746–KF899751, MK422114 and HM239675                                                                                                                                                                                      |
|                             | de Oliveira Ribeiro et al. (2012)      | JQ365581–JQ365585                                                                                                                                                                                                             |
|                             | Doukakis et al. (2011)                 | HQ171735–HQ171776                                                                                                                                                                                                             |
|                             | Hastings and Burton (2010)*            | GU440527                                                                                                                                                                                                                      |
|                             | Jabado et al. (2015a)                  | KM973194–KM973197                                                                                                                                                                                                             |
|                             | Jabado et al. (2015b)                  | KP177233–KP177307                                                                                                                                                                                                             |
|                             | Sarmiento-Camacho et al. (2018)        | MG837998–MG838000                                                                                                                                                                                                             |
|                             | Segura-Garcia and Yain Tun (2018)*     | MH235722 and MH235723                                                                                                                                                                                                         |
|                             | Semiring et al. (2015)                 | KF590254, KF590255, KF590271 - KF590276, KF590305, KF590315, KF590317–KF590323, KF590327, KF590347, KF590348, KF590358, KF590359, KF590394, KF590431, KF590449–KF590455, KF793729, KF793738 - KF793742, KF793753 and KF793757 |

|                         |                                       |                                                                                   |
|-------------------------|---------------------------------------|-----------------------------------------------------------------------------------|
|                         | Steinke et al. (2015)                 | JF494559–JF494561                                                                 |
|                         | Sukumar et al. (2020)                 | MH593266–MH593272 and MH593283–MH593289                                           |
|                         | Wainwright et al. (2018)              | MH243101, MH243108, MH243124, MH243126, MH243128, MH243141, MH243147 and MH243148 |
|                         | Ward et al. (2008)                    | EU399011–EU399014                                                                 |
|                         | Wong et al. (2009)                    | FJ519373–FJ519458 and FJ519635–FJ519637                                           |
|                         | Zemlak et al. (2012)                  | DQ885056, DQ885057 and DQ885126–DQ885127                                          |
|                         | Zhang and Hanner (2012)               | FJ237951–FJ237956                                                                 |
| <hr/>                   |                                       |                                                                                   |
| <i>Sphyrna mokarran</i> | Appleyard et al. (2018)               | MF508693                                                                          |
|                         | da Silva Ferrette et al. (2019)       | MH911047, MH911048 and MK188802                                                   |
|                         | Feitosa et al. (2018)                 | MF686574                                                                          |
|                         | Hacohen-Domene et al. (2018)*         | MK188824                                                                          |
|                         | Jabado et al. (2015a)                 | KM973189–KM973193                                                                 |
|                         | Jabado et al. (2015b)                 | KP193257 and KP177308–KP177317                                                    |
|                         | Moore et al. (2012)                   | JN989316                                                                          |
|                         | Spaet and Berumen (2015)              | KM396934                                                                          |
|                         | Ward et al. (2008)                    | EU399015–EU399017                                                                 |
|                         | Wong et al. (2009)                    | FJ519459–FJ519488, FJ519639 and FJ519641                                          |
| <hr/>                   |                                       |                                                                                   |
| <i>Sphyrna zygaena</i>  | Aguilar et al. (2020)*                | MT455636 and MT455637                                                             |
|                         | Almerón-Souza et al. (2018)           | MG703560                                                                          |
|                         | Appleyard et al. (2018)               | MF508694                                                                          |
|                         | Bineesh et al. (2016)                 | KF899752–KF899757                                                                 |
|                         | Chuang et al. (2016)                  | KP719454–KP719458                                                                 |
|                         | International Barcode of Life (2011)* | HM909793                                                                          |

|                             |                             |                                                                                                                                                                                                                                        |
|-----------------------------|-----------------------------|----------------------------------------------------------------------------------------------------------------------------------------------------------------------------------------------------------------------------------------|
|                             | Jabado et al. (2015b)       | KP193202, KP193220, KP193242, KP193256, KP193263, KP193278, KP193292, KP193302, KP193305, KP193316, KP193333, KP193343, KP193355, KP193356, KP193360, KP193361, KP193397, KP193404, KP193417, KP193426, KP193444 and KP177224–KP177232 |
|                             | Liu et al. (2013)           | KF606765, KF606766, KF606815 and KF606858                                                                                                                                                                                              |
|                             | Marín et al. (2018)         | MH194422, MH194471 - MH194475, MH194487, MH194504, MH194431 and MK070513                                                                                                                                                               |
|                             | Mwangi et al. (2019)*       | MK545100 and MK545101                                                                                                                                                                                                                  |
|                             | Sembiring et al. (2015)     | KF590243, KF590430, KF590432 and KF590433                                                                                                                                                                                              |
|                             | Steinke et al. (2015)       | JF494562–JF494564                                                                                                                                                                                                                      |
|                             | Velez-Zuazo et al. (2015)   | KJ146045                                                                                                                                                                                                                               |
|                             | Ward et al. (2008)          | EU399018                                                                                                                                                                                                                               |
|                             | Wong et al. (2009)          | FJ519525–FJ519544                                                                                                                                                                                                                      |
| <i>Stegostoma fasciatum</i> | Bineesh et al. (2016)       | HM239676                                                                                                                                                                                                                               |
|                             | Doukakis et al. (2011)      | HQ171777                                                                                                                                                                                                                               |
|                             | Dudgeon et al. (2009)       | FJ178398–FJ178402                                                                                                                                                                                                                      |
|                             | Jabado et al. (2015a)       | KM973166–KM973170                                                                                                                                                                                                                      |
|                             | Jabado et al. (2015b)       | KP193228 and KP193405                                                                                                                                                                                                                  |
|                             | Sembiring et al. (2015)     | KF590349                                                                                                                                                                                                                               |
|                             | Ward et al. (2008)          | EU399050–EU399053                                                                                                                                                                                                                      |
|                             | Zacharia et al. (2016)*     | KX063639                                                                                                                                                                                                                               |
| <i>Triaenodon obesus</i>    | Bineesh et al. (2016)       | KF899764–KF899767                                                                                                                                                                                                                      |
|                             | Diaz-Ferguson et al. (2016) | KT275201–KT275239                                                                                                                                                                                                                      |
|                             | Sembiring et al. (2015)     | KF590341, KF590361 and KF590388                                                                                                                                                                                                        |
|                             | Sijo et al. (2019)*         | MK492925                                                                                                                                                                                                                               |
|                             | Spaet and Berumen (2015)    | KM396947                                                                                                                                                                                                                               |
|                             | Wong et al. (2009)          | FJ519288 and FJ519289                                                                                                                                                                                                                  |



**Table S2.** List of authors along with the corresponding GenBank accession numbers of cytochrome c oxidase subunit I (COI) sequences of ray species ( $n = 19$ ) that have been used in the present study. Asterix (\*) indicate sequences that have not been published but is available on GenBank.

| <b>Species name (rays)</b>   | <b>Authors</b>                        | <b>Accession numbers of COI sequences in GenBank</b>                    |
|------------------------------|---------------------------------------|-------------------------------------------------------------------------|
| <i>Aetobatus narinari</i>    | Richards et al. (2009)                | FJ812200–FJ812203                                                       |
|                              | Sales et al. (2019)                   | MK340509–MK340527                                                       |
| <i>Aetobatus ocellatus</i>   | Berthe et al. (2016)                  | KT208286–KT208291                                                       |
|                              | Hartoko et al. (2020)                 | LC505460                                                                |
|                              | John et al. (2020)                    | MG774904                                                                |
|                              | Lim et al. (2015)                     | KM073028 and KM073029                                                   |
|                              | Mohd-Arshaad et al. (2016)*           | KX219586                                                                |
|                              | Ravi et al. (2019)*                   | MK422135–MK422137                                                       |
|                              | Ward et al. (2008)                    | EU398508                                                                |
| <i>Brevitrygon imbricata</i> | Bhagyalekshmi and Kumar (2021)        | MT776900                                                                |
|                              | Bhaskar and Das (2018)*               | MK331965 and MK331966                                                   |
|                              | Bineesh et al. (2016)                 | KF899354–KF899356 and KF899512–KF899521                                 |
|                              | Habib et al. (2017a)                  | MF611582                                                                |
|                              | International Barcode of Life (2010)* | GU673374                                                                |
|                              | Last et al. (2013)                    | KF604909 and KF604917                                                   |
|                              | Prasannakumar et al. (2008)*          | FJ384709                                                                |
|                              | Rabaoui et al. (2019)                 | KU317892 and KU317893                                                   |
| <i>Brevitrygon walga</i>     | Ahmed et al. (2021)                   | MH429304, MH429305, MH429306, MH429310, MN013425, MH230948 and MN083136 |
|                              | Basumatary et al. (2017)              | MF495712 and MF495713                                                   |

|                           |                                       |                                                                                                                                                         |
|---------------------------|---------------------------------------|---------------------------------------------------------------------------------------------------------------------------------------------------------|
|                           | Habib et al. (2017b)*                 | MF614769                                                                                                                                                |
|                           | International Barcode of Life (2011)* | HQ955940 and HQ955948                                                                                                                                   |
|                           | Last et al. (2013)                    | KF604912                                                                                                                                                |
|                           | Lim et al. (2015)                     | KM072994 and KM072995                                                                                                                                   |
|                           | Ward et al. (2008)                    | EU398872–EU398876                                                                                                                                       |
| <i>Gymnura micrura</i>    | International Barcode of Life (2010)* | HQ575754 and HQ575767                                                                                                                                   |
|                           | Sales et al. (2019)                   | MN105752, MN105825–MN105830, MN105832, MN105833 and MN105836–MN105838                                                                                   |
| <i>Gymnura poecilura</i>  | Ahmed et al. (2021)                   | MH230947                                                                                                                                                |
|                           | Basumatary et al. (2017)              | MF495714 and MF495715                                                                                                                                   |
|                           | Bineesh et al. (2016)                 | KF899442, KF899443, KF899444, KF899445 and KF89944                                                                                                      |
|                           | Habib et al. (2019)*                  | MN458407                                                                                                                                                |
|                           | Haque et al. (2019)                   | MH842007                                                                                                                                                |
|                           | John et al. (2020)                    | MG774900, MG774901, MG774908, MG774909, MG774911, MG774912, MG774920, MG774921, MG792071–MG792073.1, MG792081, MG792085–MG792087, MG792089 and MG792090 |
|                           | Kumar et al. (2015)                   | JX978320–JX978324                                                                                                                                       |
|                           | Rabaoui et al. (2019)                 | KU499632 and KU499714                                                                                                                                   |
|                           | Ward et al. (2008)                    | EU398804                                                                                                                                                |
| <i>Himantura leoparda</i> | Arlyza et al. (2013a)                 | JX263361–JX263417                                                                                                                                       |
|                           | Bineesh et al. (2016)                 | KF899353 and KF899500–KF899502                                                                                                                          |
|                           | John et al. (2020)                    | MG792078, MG792101, MG792112, MG792113, MG792124, MG792125, MG774902, MG774903, MG774913.1, MG774915 and MG774922                                       |
|                           | Lim et al. (2015)                     | KM072996–KM072998                                                                                                                                       |



|                             |                                    |                                                    |
|-----------------------------|------------------------------------|----------------------------------------------------|
|                             | Ravi et al. (2019)*                | MK422130                                           |
|                             | Steinke et al. (2015)              | JF493651 and JF493652                              |
| <i>Himantura uarnak</i>     | Arlyza et al. (2013a)              | JX263337–JX263360                                  |
|                             | Bineesh et al. (2016)              | KF899507–KF899511                                  |
|                             | Cerutti-Pereyra et al. (2012)      | JQ765509, JQ765519–JQ765530, JQ765594 and JQ765595 |
|                             | John et al. (2020)                 | MG792110 and MG792123                              |
|                             | Lim et al. (2015)                  | KM072999 and KM073000                              |
|                             | Yokes (2016)*                      | KY176708                                           |
| <i>Maculabatis gerrardi</i> | Ahmed et al. (2021)                | MH230945                                           |
|                             | Arlyza et al. (2013a)              | JX263423 and JX263424                              |
|                             | Bineesh et al. (2016)              | KF899364, KF899476–KF899487                        |
|                             | Kumar et al. (2015)                | KC175446 and JX978325                              |
|                             | Lim et al. (2015)                  | KM073002 and KM073003                              |
|                             | Ravi et al. (2019)*                | MK422126–MK422129                                  |
|                             | Segura-Garcia and Yain Tun (2018)* | MH235645                                           |
|                             | Steinke et al. (2015)              | JF493648–JF493650                                  |
|                             | Wainwright et al. (2018)           | MH243129 and MH243130                              |
|                             | Ward et al. (2005)                 | DQ108164 and DQ108177                              |
|                             | Ward et al. (2008)                 | EU398840–EU398840                                  |
|                             | Zacharia et al. (2014)*            | KJ475200                                           |
| <i>Mobula birostris</i>     | Bineesh et al. (2016)              | KF899564–KF899569                                  |
|                             | Poortvliet et al. (2015)           | KM364883 and KM364884                              |
|                             | Steinke et al. (2011)              | JF493862–JF493866                                  |

|                                    |                                        |                                                                                  |
|------------------------------------|----------------------------------------|----------------------------------------------------------------------------------|
|                                    | Ward et al. (2008)                     | EU398902–EU398904                                                                |
| <i>Mobula kuhlii</i>               | Bineesh et al. (2016)                  | KF899581–KF899583                                                                |
|                                    | Haque et al. (2019)                    | MH841993                                                                         |
|                                    | International Barcode of Life (2010)*  | GU673390                                                                         |
|                                    | Lim et al. (2015)                      | KM073011                                                                         |
|                                    | Poortvliet et al. (2015)               | KM364893–KM364896                                                                |
|                                    | Segura-Garcia and Yain Tun (2018)*     | MH235671                                                                         |
|                                    | Steinke et al. (2011)                  | JF493895–JF493899                                                                |
|                                    | Ward et al. (2008)                     | EU398907                                                                         |
| <i>Mobula mobular</i> <sup>1</sup> | Ahmed et al. (2021)                    | MH230952                                                                         |
|                                    | Bamaniya et al. (2016)*                | KJ093277 and KJ093278                                                            |
|                                    | Bineesh et al. (2016)                  | KF899570                                                                         |
|                                    | Cariani et al. (2017)                  | KT307247                                                                         |
|                                    | Chuang et al. (2016)                   | KP719334–KP719338                                                                |
|                                    | Haque et al. (2019)                    | MH842002                                                                         |
|                                    | International Barcode of Life (2010)*  | GU674092, GU674234–GU674236, GU674396, GU674397, GU674399 and GU674401           |
|                                    | International Barcode of Life (2011)*  | HQ956137                                                                         |
|                                    | John et al. (2020)                     | MG774910                                                                         |
|                                    | Kumar et al. (2015)                    | KC175452                                                                         |
|                                    | Manjusha and Madhusoodanakurup (2010)* | HQ589285 and HQ589286                                                            |
|                                    | Marín et al. (2018)                    | MH194451–MH194453, MH194455, MH194457, MH194461, MH194464, MH194469 and MK070516 |
|                                    | Poortvliet et al. (2015)               | KM364889–KM364892, KM364897 and KP175584–KP175670                                |

|                                    |                                 |
|------------------------------------|---------------------------------|
| Segura-Garcia and Yain Tun (2018)* | MH235670                        |
| Wainwright et al. (2018)           | MH243244, MH243247 and MH243249 |
| Ward et al. (2008)                 | EU398908 and EU398909           |

<sup>1</sup>Sequences of *Mobular japonica* have been included under *Mobula mobular* as the former is a junior synonym of *M. mobular* and both species are conspecifics (Last et al., 2016; White et al., 2017)

---

|                          |                                       |                       |
|--------------------------|---------------------------------------|-----------------------|
| <i>Mobula tarapacana</i> | Bineesh et al. (2016)                 | KF899576–KF899580     |
|                          | Chuang et al. (20016)                 | KP719339              |
|                          | Gargan et al. (2017)                  | KY454873              |
|                          | International Barcode of Life (2010)* | GU673481              |
|                          | Li et al. (2016)*                     | KX060791–KX060795     |
|                          | Poortvliet et al. (2015)              | KM364901–KM364903     |
|                          | Wainwright et al. (2018)              | MH243238 and MH243252 |
|                          | Ward et al. (2008)                    | EU398910–EU398913     |

---

|                         |                                       |                                                                                             |
|-------------------------|---------------------------------------|---------------------------------------------------------------------------------------------|
| <i>Mobula thurstoni</i> | Chuang et al. (2016)                  | KP719340                                                                                    |
|                         | da Silva Ferrette et al. (2019)       | MK085566, MK085584 and MK085596                                                             |
|                         | International Barcode of Life (2010)* | GU673712, GU673713, GU674394 and GU674398                                                   |
|                         | John et al. (2020)                    | MG792109 and MG792121                                                                       |
|                         | Li et al. (2016)*                     | KX060796                                                                                    |
|                         | Lim et al. (2015)                     | KM073012                                                                                    |
|                         | Poortvliet et al. (2015)              | KM364904–KM364906                                                                           |
|                         | Segura-Garcia and Yain Tun (2018)*    | MH235673 and MH235674                                                                       |
|                         | Wainwright et al. (2018)              | MH243242, MH243243, MH243245, MH243246, MH243250, MH243251, MH243255, MH243258 and MH243259 |
| Ward et al. (2008)      | EU398914–EU398918                     |                                                                                             |

|                                  |                                       |                                                 |
|----------------------------------|---------------------------------------|-------------------------------------------------|
|                                  | Zacharia et al. (2016)*               | KX063641                                        |
| <i>Neotrygon indica</i>          | Arlyza et al. (2013a)                 | JX263421                                        |
|                                  | Bineesh e al. (2016)                  | HM467799 and KF899609–KF899613                  |
|                                  | Borsa et al. (2013)                   | KC295416                                        |
|                                  | Borsa et al. (2016)                   | KU498035–KU498038                               |
|                                  | Kumar et al. (2015)                   | JX978329                                        |
|                                  | Puckridge et al. (2013)               | KC249906                                        |
|                                  | Santhanakrishnan et al. (2015)*       | KT794001                                        |
| <i>Neotrygon kuhlii</i>          | Arlyza et al. (2013b)                 | JX304892–JX304915                               |
|                                  | Borsa et al. (2016)                   | KU497940–KU497945 and KU497952–KU497960         |
| <i>Pateobatis jenkinsii</i>      | Ahmed et al. (2021)                   | MH230946                                        |
|                                  | Bineesh et al. (2016)                 | KF913237 and KF913238                           |
|                                  | Cerutti-Pereyra et al. (2012)         | JQ765516–JQ765518                               |
|                                  | International Barcode of Life (2010)* | GU673708                                        |
|                                  | John et al. (2020)                    | MG792059, MG792066, MG792068, MG792094–MG792096 |
|                                  | Lim et al. (2015)                     | KM072991– KM072993                              |
|                                  | Ravi et al. (2019)*                   | MK422144                                        |
|                                  | Segura-Garcia and Yain Tun (2018)*    | MH235683                                        |
|                                  | Ward et al. (2005)                    | DQ108168 and DQ108169                           |
| Ward et al. (2008)               | EU398850 and EU398851                 |                                                 |
| <i>Pteroplatytrygon violacea</i> | Bentley and Wiley (2013)*             | KF930342                                        |
|                                  | Bineesh et al. (2016)                 | KF899654–KF899658 and HM239671                  |
|                                  | Cariani et al. (2017)                 | KT307370–KT307373                               |

|                       |                                        |                                                               |
|-----------------------|----------------------------------------|---------------------------------------------------------------|
|                       | da Silva Ferrette et al. (2019)        | MK085554, MK085585, MK085660, MK085682, MK085718 and MK085720 |
|                       | da Silva Rodrigues Filho et al. (2020) | MN105751                                                      |
|                       | Hastings and Burton (2010)*            | GU440486                                                      |
|                       | Iglesias et al. (2013)*                | KF808209                                                      |
|                       | International Barcode of Life (2010)*  | GU674230                                                      |
|                       | Marín et al. (2018)                    | MH194458                                                      |
|                       | Ramírez-Amaro et al. (2018)            | KY949117–KY949119                                             |
|                       | Song and Kim (2017)*                   | MG573151                                                      |
| <hr/>                 |                                        |                                                               |
| <i>Taeniura lymma</i> | Azmir et al. (2017)                    | KY849556                                                      |
|                       | Bentley and Wiley (2013)*              | KF930495                                                      |
|                       | Cerutti-Pereyra et al. (2012)          | JQ765547–JQ765553, JQ815396 and JQ929048                      |
|                       | John et al. (2020)                     | MG792060 and MG774926                                         |
|                       | Lim et al. (2015)                      | KM073026 and KM073027                                         |
|                       | Puckridge et al. (2013)                | KC250631 and KC250633                                         |
|                       | Steinke et al. (2009)                  | FJ584168–FJ584170                                             |
| <hr/>                 |                                        |                                                               |

**Table S3.** Diversity indices for shark species, using the mitochondrial cytochrome C oxidase subunit I:  $n$ , sample size;  $h$ , haplotype diversity;  $\pi$ , nucleotide diversity; HAP, number of haplotypes observed; UHAP, number of unique haplotypes; DHAP, number of dominant haplotypes observed; SHAP, number of shared haplotypes other than the dominant haplotype.

| Species name                             | Topology           | $h$               | $\pi$               | HAP | UHAP | DHAP     | SHAP |
|------------------------------------------|--------------------|-------------------|---------------------|-----|------|----------|------|
| <i>A. pelagicus</i> ( $n=146$ )          | Complex star       | $0.577 \pm 0.043$ | $0.005 \pm 0.0005$  | 14  | 9    | 1 (Hap1) | 4    |
| <i>A. superciliosus</i> ( $n=104$ )      | Star               | $0.164 \pm 0.049$ | $0.0005 \pm 0.0001$ | 6   | 5    | 1 (Hap1) | -    |
| <i>A. vulpinus</i> ( $n=44$ )            | Star               | $0.40 \pm 0.093$  | $0.015 \pm 0.006$   | 5   | 4    | 1 (Hap1) | -    |
| <i>Ca. altimus</i> ( $n=29$ )            | Simple linear      | $0.64 \pm 0.092$  | $0.002 \pm 0.0004$  | 7   | 5    | 1 (Hap3) | 1    |
| <i>Ca. amblyrhynchoides</i> ( $n=32$ )   | Complex star       | $0.659 \pm 0.083$ | $0.004 \pm 0.001$   | 8   | 5    | -        | 3    |
| <i>Ca. amboinensis</i> ( $n=72$ )        | Star               | $0.108 \pm 0.049$ | $0.002 \pm 0.0011$  | 3   | 2    | 1 (Hap1) | -    |
| <i>Ca. brevipinna</i> ( $n=132$ )        | Star               | $0.34 \pm 0.054$  | $0.005 \pm 0.0013$  | 14  | 11   | 1 (Hap1) | 2    |
| <i>Ca. dussumieri</i> ( $n=24$ )         | Simple exclusive   | $0.594 \pm 0.083$ | $0.027 \pm 0.0039$  | 5   | 4    | -        | 1    |
| <i>Ca. falciformis</i> ( $n=116$ )       | Complex mutational | $0.386 \pm 0.055$ | $0.003 \pm 0.001$   | 9   | 7    | 1 (Hap5) | 1    |
| <i>Ca. leucas</i> ( $n=66$ )             | Star               | $0.30 \pm 0.07$   | $0.003 \pm 0.0007$  | 4   | 3    | 1 (Hap1) | -    |
| <i>Ca. limbatus</i> ( $n=78$ )           | Complex mutational | $0.535 \pm 0.063$ | $0.018 \pm 0.0084$  | 6   | 5    | 1 (Hap1) | -    |
| <i>Ca. longimanus</i> ( $n=30$ )         | Star               | $0.179 \pm 0.088$ | $0.0003 \pm 0.0001$ | 3   | 2    | 1 (Hap1) | -    |
| <i>Ca. macloiti</i> ( $n=12$ )           | Star               | $0.561 \pm 0.015$ | $0.002 \pm 0.00053$ | 4   | 3    | -        | 1    |
| <i>Ca. melanopterus</i> ( $n=54$ )       | Complex mutational | $0.382 \pm 0.078$ | $0.003 \pm 0.0012$  | 4   | 1    | 1 (Hap1) | 2    |
| <i>Ca. plumbeus</i> ( $n=48$ )           | Simple linear      | $0.671 \pm 0.033$ | $0.002 \pm 0.0002$  | 4   | 1    | -        | 3    |
| <i>Ca. sealei</i> ( $n=18$ )             | Star               | $0.529 \pm 0.001$ | $0.003 \pm 0.00094$ | 4   | 3    | -        | 4    |
| <i>Ca. sorrah</i> ( $n=124$ )            | Complex mutational | $0.181 \pm 0.046$ | $0.002 \pm 0.001$   | 5   | 3    | 1 (Hap1) | 1    |
| <i>Carcharias taurus</i>                 | Complex mutational | $0.535 \pm 0.023$ | $0.015 \pm 0.0005$  | 5   | 3    | 1 (Hap2) | 1    |
| <i>Carcharodon carcharias</i> ( $n=18$ ) | Simple             | $0.004 \pm 0.066$ | $0.003 \pm 0.0003$  | 5   | 2    | -        | 3    |
| <i>Ce. maximus</i> ( $n=56$ )            | Star               | $0.449 \pm 0.081$ | $0.001 \pm 0.00035$ | 5   | 2    | -        | 2    |
| <i>Ch. griseum</i> ( $n=12$ )            | Single             | $0.15 \pm 0.126$  | $0.003 \pm 0.0059$  | 1   | 1    | -        | -    |
| <i>Ch. indicum</i> ( $n=14$ )            | Simple             | $0.527 \pm 0.064$ | $0.0008 \pm 0.0001$ | 2   | 2    | -        | -    |
| <i>Ch. punctatum</i> ( $n=20$ )          | Star               | $0.826 \pm 0.061$ | $0.005 \pm 0.0001$  | 8   | 7    | 1 (Hap4) | -    |
| <i>G. cuvier</i> ( $n=228$ )             | Star               | $0.44 \pm 0.024$  | $0.002 \pm 0.0002$  | 3   | 1    | 1 (Hap2) | 1    |
| <i>I. oxyrinchus</i> ( $n=140$ )         | Complex star       | $0.785 \pm 0.024$ | $0.009 \pm 0.0005$  | 17  | 10   | -        | 7    |

|                               |                    |               |                 |    |    |          |   |
|-------------------------------|--------------------|---------------|-----------------|----|----|----------|---|
| <i>I. paucus</i> (n=46)       | Star               | 0.63 ± 0.039  | 0.002 ± 0.0002  | 4  | 1  | -        | 3 |
| <i>L. ditropis</i> (n=15)     | Star               | 0.91 ± 0.047  | 0.003 ± 0.0089  | 9  | 9  | -        | - |
| <i>L. nasus</i> (n=81)        | Complex star       | 0.844 ± 0.034 | 0.007 ± 0.0089  | 23 | 19 | -        | 4 |
| <i>N. acutidens</i> (n=31)    | Simple linear      | 0.701 ± 0.034 | 0.003 ± 0.0019  | 4  | 3  | -        | 1 |
| <i>N. brevirostris</i> (n=11) | Single             | 0             | 0               | 1  | -  | 1 (Hap1) | - |
| <i>P. glauca</i> (n=534)      | Single             | 0             | 0               | 1  | -  | 1 (Hap1) | - |
| <i>Rhin. typus</i> (n=48)     | Simple             | 0.12 ± 0.061  | 0.0002 ± 0.0001 | 2  | -  | 1 (Hap1) | 1 |
| <i>Rhiz. acutus</i> (n=78)    | Complex mutational | 0.461 ± 0.049 | 0.0004 ± 0.0005 | 5  | 3  | 1 (Hap2) | 1 |
| <i>Rhiz. oligolinx</i> (n=15) | Complex star       | 0.02 ± 0.142  | 0.119 ± 0.0079  | 3  | 2  | 1 (Hap1) | - |
| <i>S. laticaudus</i> (n=27)   | Simple             | 0.74 ± 0.062  | 0.047 ± 0.024   | 6  | 4  | -        | 2 |
| <i>Sp. lewini</i> (n=323)     | Complex mutational | 0.53 ± 0.026  | 0.023 ± 0.001   | 12 | 9  | 1 (Hap3) | 2 |
| <i>Sp. mokarran</i> (n=59)    | Complex mutational | 0.1 ± 0.053   | 0.0007 ± 0.0004 | 4  | 3  | 1 (Hap1) | - |
| <i>Sp. zygaena</i> (n=91)     | Single             | 0             | 0               | 1  | -  | 1 (Hap1) | - |
| <i>St. fasciatum</i> (n=26)   | Star               | 0.46 ± 0.116  | 0.001 ± 0.0004  | 5  | 4  | 1 (Hap1) | - |
| <i>T. obesus</i> (n=53)       | Star               | 0.428 ± 0.075 | 0.0012 ± 0.0003 | 5  | 3  | 1 (Hap2) | 1 |

**Table S4.** Diversity indices for ray species, based on the mitochondrial cytochrome C oxidase subunit I: *n*, sample size; *h*, haplotype diversity;  $\pi$ , nucleotide diversity; HAP, number of haplotypes observed; UHAP, number of unique haplotypes; DHAP, number of dominant haplotypes observed; OHAP, number of shared haplotypes other than the dominant haplotype.

| Species name                           | Topology           | <i>h</i>      | $\pi$           | HAP | UHAP | DHAP      | SHAP |
|----------------------------------------|--------------------|---------------|-----------------|-----|------|-----------|------|
| <i>A. narinari</i> ( <i>n</i> =29)     | Star               | 0.25 ± 0.12   | 0.001 ± 0.0008  | 8   | 7    | -         | 1    |
| <i>A. ocellatus</i> ( <i>n</i> =18)    | Complex mutational | 0.76 ± 0.066  | 0.026 ± 0.059   | 5   | 4    | -         | 1    |
| <i>B. imbricata</i> ( <i>n</i> =23)    | Complex mutational | 0.838 ± 0.053 | 0.036 ± 0.0096  | 5   | 5    | -         | -    |
| <i>B. walga</i> ( <i>n</i> = 20)       | Simple exclusive   | 0.963 ± 0.028 | 0.023 ± 0.0014  | 14  | 13   | 1 (Hap10) | -    |
| <i>G. micrura</i> ( <i>n</i> =15)      | Simple exclusive   | 0.848 ± 0.088 | 0.028 ± 0.0127  | 9   | 9    | -         | -    |
| <i>G. poecilura</i> ( <i>n</i> =39)    | Complex mutational | 0.84 ± 0.047  | 0.042 ± 0.0087  | 14  | 13   | -         | 1    |
| <i>H. leoparda</i> ( <i>n</i> =78)     | Simple exclusive   | 0.9 ± 0.019   | 0.030 ± 0.019   | 20  | 20   | -         | -    |
| <i>H. uarnak</i> ( <i>n</i> =49)       | Complex mutational | 0.91 ± 0.0003 | 0.036 ± 0.0074  | 12  | 12   | -         | -    |
| <i>Mac. gerrardi</i>                   | Complex mutational | 0.875 ± 0.029 | 0.023 ± 0.003   | 11  | 9    | -         | 2    |
| <i>Mob. birostris</i> ( <i>n</i> =16)  | Star               | 0.61 ± 0.130  | 0.002± 0.0005   | 5   | 4    | 1(Hap 2)  | -    |
| <i>Mob. kuhlii</i> ( <i>n</i> =18)     | Simple             | 0.853 ± 0.053 | 0.005 ± 0.0014  | 7   | 5    | -         | 2    |
| <i>Mob. mobular</i> ( <i>n</i> =166)   | Complex star       | 0.51 ± 0.034  | 0.003 ± 0.0007  | 13  | 11   | 1 (Hap1)  | 1    |
| <i>Mob. tarapacana</i> ( <i>n</i> =23) | Star               | 0.17 ± 0.102  | 0.002 ± 0.0051  | 3   | 2    | 1         | -    |
| <i>Mob. thurstoni</i> ( <i>n</i> =32)  | Star               | 0.712 ± 0.037 | 0.003 ± 0.0003  | 4   | 2    | -         | 2    |
| <i>N. indica</i> ( <i>n</i> =15)       | Complex mutational | 0.905 ± 0.084 | 0.011 ± 0.0012  | 9   | 9    | -         | -    |
| <i>N. kuhlii</i> ( <i>n</i> =59)       | Complex mutational | 0.8 ± 0.045   | 0.015 ± 0.00103 | 12  | 12   | -         | -    |
| <i>P. jenkinsii</i>                    | Complex mutational | 0.823 ± 0.06  | 0.032 ± 0.0661  | 6   | 5    | 1         | -    |
| <i>P. violacea</i>                     | Complex mutational | 0.671 ± 0.082 | 0.007 ± 0.004   | 5   | 2    | 1 (Hap 4) | 2    |
| <i>T. lymma</i> ( <i>n</i> =20)        | Complex mutational | 0.82 ± 0.058  | 0.024 ± 0.014   | 5   | 4    | 1 (Hap 3) | -    |



## References

- Ahmed, MS, Datta, S, Saha, T, Hossain, Z, 2021. Molecular characterization of marine and coastal fishes of Bangladesh through DNA barcodes. *Ecology and Evolution*, 11(2), pp.3696–3709. doi:10.1002/ece3.7355.
- Alghozali, FA, Wijayanti, DP, Sabdono, A, 2019. Genetic diversity of scalloped hammerhead sharks (*Sphyrna lewini*) landed in Muncar Fishing Port, Banyuwangi. *Biodiversitas Journal of Biological Diversity*, 20(4), pp.1154–1159. doi: 10.13057/biodiv/d200430.
- Almerón-Souza, F, Sperb, C, Castilho, CL, Figueiredo, PI, Gonçalves, LT, Machado, R, Oliveira, LR, Valiati, VH, Fagundes, NJ. 2018. Molecular identification of shark meat from local markets in southern Brazil based on DNA barcoding: evidence for mislabeling and trade of endangered species. *Frontiers in Genetics*, 9, p.138. doi: <https://doi.org/10.3389/fgene.2018.00138>
- Arlyza, IS, Shen, KN, Solihin, DD, Soedharma, D, Berrebi, P, Borsa, P. 2013. Species boundaries in the *Himantura uarnak* species complex (Myliobatiformes: Dasyatidae). *Molecular Phylogenetics and Evolution*, 66(1), pp.429–435. <https://doi.org/10.1016/j.ympev.2012.09.023>
- Arlyza, IS, Shen, KN, Durand, JD, Borsa, P. 2013. Mitochondrial haplotypes indicate parapatric-like phylogeographic structure in blue-spotted maskray (*Neotrygon kuhlii*) from the Coral Triangle region. *Journal of Heredity*, 104(5), pp.725–733. doi: 10.1093/jhered/est044
- Andriyono, S, Alam, MJ, Kim, HW. 2020. The Jawa and Bali Island Marine Fish Molecular Identification to Improve 12S rRNA-tRNA Valin-16S rRNA Partial Region Sequences on the GenBank Database. *Thalassas: An International Journal of Marine Sciences*, 36(2), pp.343–356. <https://doi.org/10.1007/s41208-020-00196-x>
- Appleyard, SA, White, WT, Vieira, S, Sabub, B. 2018. Artisanal shark fishing in Milne Bay Province, Papua New Guinea: biomass estimation from genetically identified shark and ray fins. *Scientific reports*, 8(1), pp.1-12. doi: [10.1038/s41598-018-25101-8](https://doi.org/10.1038/s41598-018-25101-8)
- Azmir, IA, Esa, Y, Amin, SMN, Md Yasin, IS, Md Yusof, FZ. 2017. Identification of larval fish in mangrove areas of Peninsular Malaysia using morphology and DNA barcoding methods. *Journal of Applied Ichthyology*, 33(5), pp.998–1006. doi: 10.1111/jai.13425
- Barbuto, M, Galimberti, A, Ferri, E, Labra, M, Malandra, R, Galli, P, Casiraghi, M. 2010. DNA barcoding reveals fraudulent substitutions in shark seafood products: the Italian case of “palombo”( *Mustelus spp.*). *Food research international*, 43(1), pp.376–381. <https://doi.org/10.1016/j.foodres.2009.10.009>

- Bengil, EGT, Akalin, M, Kizilkaya, IT, Bengil, F. 2019. Biology of shortfin mako shark (*Isurus oxyrinchus* Rafinesque, 1810) from the Eastern Mediterranean. *Acta Aquatica Turcica*, 15(4), pp.425–432. doi: 10.22392/actaquatr.545997
- Bénard-Capelle, J., Guillonneau, V., Nouvian, C., Fournier, N., Le Loët, K., Dettai, A., 2015. Fish mislabelling in France: substitution rates and retail types. *PeerJ*, 2, p.714. doi: 10.7287/peerj.preprints.327v2
- Berthe, C, Mourier, J, Lecchini, D, Rummer, JL, Sellos, DY, Iglésias, SP. 2016. DNA barcoding supports the presence of the cryptic ocellated eagle ray, *Aetobatus ocellatus* (Myliobatidae), in French Polynesia, South Pacific. *Cybium*, 40(2), pp.181–184. doi: <https://doi.org/10.26028/cybium/2016-402-011>
- Berumen, ML, Roberts, MB, Sinclair-Taylor, TH, DiBattista, JD, Saenz-Agudelo, P, Isari, S, He, Song, Khalil, MT, Hardenstine RS, Tietbohl, MD, Priest, MA, Kattan, A, Coker, D. 2019. Fishes and connectivity of Red Sea coral reefs. In C. R. Woolstra & M. L. Berumen (Eds.), *Coral Reefs of the Red Sea*, pp. 157–179. Switzerland: Springer Cham. doi: [https://doi.org/10.1007/978-3-030-05802-9\\_8](https://doi.org/10.1007/978-3-030-05802-9_8)
- Bhagyalekshmi, V, Kumar, AB. 2021. Bycatch of non-commercial batoids in the trawl fishery of south India: Status and conservation prerequisites. *Regional Studies in Marine Science*, 44, p.101738. doi: 10.1016/j.rsma.2021.101738
- Bineesh, KK, Gopalakrishnan, A, Akhilesh, KV, Sajeela, KA, Abdussamad, EM, Pillai, NGK, Basheer, VS, Jena, JK, Ward, RD. 2016. DNA barcoding reveals species composition of sharks and rays in the Indian commercial fishery. *Mitochondrial Dna Part A*, 28(4), pp.458–472. doi: 10.3109/19401736.2015.1137900
- Borsa, P, Arlyza, IS., Chen, WJ, Durand, JD, Meekan, MG, Shen, KN. 2013. Resurrection of New Caledonian maskray *Neotrygon trigonoides* (Myliobatoidei: Dasyatidae) from synonymy with *N. kuhlii*, based on cytochrome-oxidase I gene sequences and spotting patterns. *Comptes Rendus Biologies*, 336(4), pp.221–232. doi: 10.1016/j.crv.2013.02.005
- Borsa, P, Shen, KN, Arlyza, IS, Hoareau, TB. 2016. Multiple cryptic species in the blue-spotted maskray (Myliobatoidei: Dasyatidae: *Neotrygon* spp.): an update. *Comptes rendus biologies*, 339(9–10), pp.417–426. doi: 10.1016/j.crv.2016.07.004
- Cardeñosa, D., Hyde, J., Caballero, S., 2014. Genetic diversity and population structure of the pelagic thresher shark (*Alopias pelagicus*) in the Pacific Ocean: evidence for two evolutionarily significant units. *PloS one*, 9(10), p.110193. doi: 10.1371/journal.pone.0110193

- Cariani, A, Messinetti, S, Ferrari, A, Arculeo, M, Bonello, JJ, Bonnici, L, Cannas, R, Carbonara, P, Cau, A, Charilaou, C, El Ouamari, N. 2017. Improving the conservation of Mediterranean chondrichthyans: the ELASMOMED DNA barcode reference library. *PLoS one*, 12(1), p.0170244. doi: 10.1371/journal.pone.0170244
- Cerutti-Pereyra, F, Meekan, MG, Wei, NWV, O'Shea, O, Bradshaw, CJ, & Austin, CM. 2012. Identification of rays through DNA barcoding: an application for ecologists. *PLoS One*, 7(6), p.36479. doi: 10.1371/journal.pone.0036479
- Chuang, PS, Hung, TC, Chang, HA, Huang, CK, Shiao, JC. 2016. The species and origin of shark fins in Taiwan's fishing ports, markets, and customs detention: A DNA barcoding analysis. *PLoS one*, 11(1), p.0147290. doi: 10.1371/journal.pone.0147290
- Clark, K, Karsch-Mizrachi, I, Lipman, DJ, Ostell, J, Sayers, EW. 2016. GenBank. *Nucleic acids research*, 44(D1), D67–D72. <https://doi.org/10.1093/nar/gkv1276>
- da Silva Ferrette, BL, Domingues, RR, Ussami, LHF, Moraes, L, de Oliveira Magalhães, C, de Amorim, AF, Hilsdorf, AWS, Oliveira, C, Foresti, F, Mendonça, FF. 2019. DNA-based species identification of shark finning seizures in Southwest Atlantic: implications for wildlife trade surveillance and law enforcement. *Biodiversity and Conservation*, 28(14), pp.4007–4025. doi: 10.1007/s10531-019-01862-0
- da Silva Rodrigues Filho, LF, Feitosa, LM, Nunes, JLS, Palmeira, ARO, Martins, APB, Giarrizzo, T, Carvalho-Costa, LF, Monteiro, ILP, Gemaque, R, Gomes, F, Souza, RFC. 2020. Molecular identification of ray species traded along the Brazilian Amazon coast. *Fisheries Research*, 223, p.105407. doi: 10.1016/j.fishres.2019.105407
- de Carvalho, CBV. 2014. DNA barcoding in forensic vertebrate species identification. *Brazilian Journal of Forensic Sciences, Medical Law and Bioethics*, 4(1), pp. 12–23. [http://dx.doi.org/10.17063/bjfs4\(1\)y201412](http://dx.doi.org/10.17063/bjfs4(1)y201412)
- Deeds, JR, Handy, SM, Fry Jr. F, Granade, H, Williams, JT, Powers, M, Shipp, R, Weigt, LA. 2014. Protocol for building a reference standard sequence library for DNA-based seafood identification. *Journal of AOAC International*, 97(6), pp.1626–1633. doi: 10.5740/jaoacint.14-111
- Benson, DA, Cavanaugh, M, Clark, K, Karsch-Mizrachi, I, Lipman, DJ, Ostell, J, Sayers, EW. 2013. GenBank. *Nucleic Acids Res*, 41(Database issue): D36–42. doi: 10.1093/nar/gks1195. Epub 2012 Nov 27. PMID: 23193287; PMCID: PMC3531190.

- Diaz-Ferguson, EE, Guzman, HM, Fahong, Y. 2016. Genetic diversity, microscale connectivity, molecular marker development and transposable elements detection in the white tip reef shark *Triaenodon obesus* (Rupell 1837). Presented at the APANAC conference, Panama City. doi: 10.13140/RG.2.2.26248.93444
- Doukakis, P, Hanner, R, Shivji, M, Bartholomew, C, Chapman, D, Wong, E, Amato, G. 2011. Applying genetic techniques to study remote shark fisheries in northeastern Madagascar. *Mitochondrial DNA*, 22(1), pp.15–20. doi: 10.3109/19401736.2010.526112
- Dudgeon, CL, Broderick, D, Ovenden, JR, 2009. IUCN classification zones concord with, but underestimate, the population genetic structure of the zebra shark *Stegostoma fasciatum* in the Indo-West Pacific. *Molecular Ecology*, 18(2), pp.248–261. doi: 10.1111/j.1365-294X.2008.04025.x
- Feitosa, LM, Martins, APB, Giarrizzo, T, Macedo, W, Monteiro, IL, Gemaque, R, Nunes, JLS, Gomes, F, Schneider, H, Sampaio, I, Souza, R. 2018. DNA-based identification reveals illegal trade of threatened shark species in a global elasmobranch conservation hotspot. *Scientific reports*, 8(1), pp.1–11. doi: 10.1038/s41598-018-21683-5
- Ferrito, V, Raffa, A, Rossitto, L, Federico, C, Saccone, S, Pappalardo, AM. 2019. Swordfish or shark slice? A rapid response by COIBar–RFLP. *Foods*, 8(11), p.537. doi: 10.3390/food8110537
- Gargan, LM, Morato, T, Pham, CK, Finarelli, JA, Carlsson, JE, Carlsson, J. 2017. Development of a sensitive detection method to survey pelagic biodiversity using eDNA and quantitative PCR: A case study of devil ray at seamounts. *Marine Biology*, 164(5), p.112. doi: 10.1007/s00227-017-3141-x
- Giovas, I, Arculeo, M, Doumpas, N, Katsada, D, Maximiadi, M, Mitsou, E, Paravas, V, Aga-Spyridopoulou, RN, Stoilas, VO, Tiralongo, F, Tsamadias, IE. 2020. Assessing multiple sources of data to detect illegal fishing, trade and mislabelling of elasmobranchs in Greek markets. *Marine Policy*, 112, p.103730. doi: 10.1016/j.marpol.2019.103730
- Habib, KA, Kim, CG, Nahar, N, Akter, S, Sathi, J, Neogi, AK, Lee, YH, Oh, J, Haque, K.I. 2017a. Assessing diversity of brackish water and marine organisms of Sundarbans mangrove forest of Bangladesh through DNA barcoding. *Genome*, 60(11), pp.940–941. doi: <https://doi.org/10.1139/gen-2017-0256>
- Haque, AB, Das, SA, Biswas, AR. 2019. DNA analysis of elasmobranch products originating from Bangladesh reveals unregulated elasmobranch fishery and trade on species of global conservation concern. *PloS one*, 14(9), p.0222273. doi: 10.1371/journal.pone.0222273

- Hartoko, A, Pringgenies, D, Anggelina, AC, Matsuishi, T. 2020. Morphology and molecular biology of benthic Java Sea shark ray *Rhina ancylostoma* Bloch and Scheider, 1801 (Elasmobranchia: Rhinidae). *Annual Research & Review in Biology*, pp.19–31. doi: 10.9734/arrb/2020/v35i430208
- Hastings, PA, Burton, RS. 2008. Establishing a DNA sequence database for the marine fish Fauna of California.
- Jabado, RW, Al Ghais, SM, Hamza, W, Shivji, MS, Henderson, AC. 2015a. Shark diversity in the Arabian/Persian Gulf higher than previously thought: insights based on species composition of shark landings in the United Arab Emirates. *Marine Biodiversity*, 45(4), pp.719–731. doi: 10.1007/s/12526-014-0275-7
- Jabado, RW, Al Ghais, SM, Hamza, W, Henderson, AC, Spaet, JL, Shivji, MS, Hanner, RH. 2015b. The trade in sharks and their products in the United Arab Emirates. *Biological Conservation*, 181, pp.190–198. doi: 10.1016/j.biocon.2014.10.032
- John, AB, Asrul, MMA, Arshaad, WM, Jalal, KCA, Sheikh, HI. 2020. In S. Trivedi, H. Rehman, S. Saggu, C. Panneerselvam, S. K. Ghosh (Eds.), *DNA Barcoding and Molecular Phylogeny* (pp. 121–136). Switzerland: Springer Nature.
- Johri, S, Solanki, J, Cantu, VA, Fellows, SR, Edwards, RA, Moreno, I, Vyas, A, Dinsdale, EA. 2019. ‘Genome skimming’ with the MinION hand-held sequencer identifies CITES-listed shark species in India’s exports market. *Scientific reports*, 9(1), pp.1–13. doi: <https://doi.org/10.1038/s41598-019-40940-9>
- Lakra, WS, Verma, MS, Goswami, M, Lal, KK, Mohindra, V, Punia, P, Gopalakrishnan, A, Singh, KV, Ward, RD, Hebert, P. 2011. DNA barcoding Indian marine fishes. *Molecular Ecology Resources*, 11(1), pp.60–71. doi: 10.1111/j.1755-0998.2010.02894.x
- Last, PR, White, WT. 2013. Two new stingrays (Chondrichthyes: Dasyatidae) from the eastern Indonesian Archipelago. *Zootaxa*, 3722, pp.1–21. doi: 10.11646/zootaxa.3722.1.
- White, WT, Last, PR. 2016. Devil rays: Family mobulidae. In P.R. Last, W.T. White, M.R. de Carvalho, B. Séret, M.F.W. Stehmann, J.P. Naylor (Eds.), *Rays of the World*, (p.726). Ithaca, NY: CSIRO Publishing.
- Lim, KC, Lim, PE, Chong, VC, Loh, KH. 2015. Molecular and morphological analyses reveal phylogenetic relationships of stingrays focusing on the family Dasyatidae (Myliobatiformes). *PLoS One*, 10(4), p.0120518. doi: <https://doi.org/10.1371/journal.pone.0120518>

- Liu, SYV, Chan, CLC, Lin, O, Hu, CS, Chen, CA. 2013. DNA barcoding of shark meats identify species composition and CITES-listed species from the markets in Taiwan. *PloS one*, 8(11), p.79373. doi: <https://doi.org/10.1371/journal.pone.0079373>
- Marín, A, Serna, J, Robles, C, Ramírez, B, Reyes-Flores, LE, Zelada-Mázmela, E, Sotil, G, Alfaro, R. 2018. A glimpse into the genetic diversity of the Peruvian seafood sector: Unveiling species substitution, mislabeling and trade of threatened species. *PloS one*, 13(11), p.0206596. doi: <https://doi.org/10.1371/journal.pone.0206596>
- McCusker, MR, Denti, D, Van Guelpen, L, Kenchington, E, Bentzen, P. 2013. Barcoding Atlantic Canada's commonly encountered marine fishes. *Molecular ecology resources*, 13(2), pp.177–188. doi: 10.1111/1755-0998.12043
- Mecklenburg, CW, Møller, PR, Steinke, D. 2011. Biodiversity of arctic marine fishes: taxonomy and zoogeography. *Marine Biodiversity*, 41(1), pp.109–140. doi: 10.1007/s12526-010-0070-z
- Moftah, M, Aziz, SHA, Elramah, S, Favereaux, A. 2011. Classification of sharks in the Egyptian Mediterranean waters using morphological and DNA barcoding approaches. *PLoS One*, 6(11), p.27001. doi: <https://doi.org/10.1371/journal.pone.0027001>
- Moore, AB, White, WT, Ward, RD, Naylor, GJ, Peirce, R. 2011. Rediscovery and redescription of the smoothtooth blacktip shark, *Carcharhinus leiodon* (Carcharhinidae), from Kuwait, with notes on its possible conservation status. *Marine and Freshwater Research*, 62(6), pp.528–539. doi: 10.1071/MF10159 1323-1650/11/060528
- Moore, AB, Ward, RD, Peirce, R. 2012. Sharks of the Persian (Arabian) Gulf: A first annotated checklist (Chondrichthyes: Elasmobranchii). *Zootaxa*, 3167, pp.1–16. doi: [10.11646/ZOOTAXA.3167.1.1](https://doi.org/10.11646/ZOOTAXA.3167.1.1)
- Momigliano, P, Jaiteh, VF. 2015. First records of the grey nurse shark *Carcharias taurus* (Lamniformes: Odontaspidae) from oceanic coral reefs in the Timor Sea. *Marine Biodiversity Records*, 8. doi: <https://doi.org/10.1017/S1755267215000354>
- National Center for Biotechnology Information (NCBI)[Internet]. Bethesda (MD): National Library of Medicine (US), National Center for Biotechnology Information; [1988]–[cited 2021 July 12]. Retrieved from: <https://www.ncbi.nlm.nih.gov/>
- Nicolè, S, Negrisolo, E, Eccher, G, Mantovani, R, Patarnello, T, Erickson, DL, Kress, WJ, Barcaccia, G. 2012. DNA barcoding as a reliable method for the authentication of commercial seafood products. *Food Technology and Biotechnology*, 50(4), pp.387–398.

- Oliveira, LM, Knebelsberger, T, Landi, M, Soares, P, Raupach, MJ, Costa, FO. 2016. Assembling and auditing a comprehensive DNA barcode reference library for European marine fishes. *Journal of fish biology*, 89(6), pp.2741–2754. doi: 10.1111/jfb.13169
- Ovenden, JR, Morgan, JA, Kashiwagi, T, Broderick, D, Salini, J. 2010. Towards better management of Australia’s shark fishery: genetic analyses reveal unexpected ratios of cryptic blacktip species *Carcharhinus tilstoni* and *C. limbatus*. *Marine and Freshwater Research*, 61(2), pp.253–262. doi: 10.1071/MF09151 1323-1650/10/020253
- Pavan-Kumar, A, Gireesh-Babu, P, Suresh Babu, PP, Jaiswar, AK, Prasad, KP, Chaudhari, Raje, SG, Chakraborty, SK, Krishna, G, Lakra, WS. 2015. DNA barcoding of elasmobranchs from Indian Coast and its reliability in delineating geographically widespread specimens. *Mitochondrial DNA*, 26(1), pp.92–100. doi: 10.3109/19401736.2013.823174
- Persis, M, Reddy, ACS, Rao, LM, Khedkar, GD, Ravinder, K, Nasruddin, K. 2009. COI (cytochrome oxidase-I) sequence based studies of Carangid fishes from Kakinada coast, India. *Molecular biology reports*, 36(7), pp.1733–1740. doi: 10.1007/s11033-008-9375-4
- Pirog, A, Jaquemet, S, Ravigné, V, Cliff, G, Clua, E, Holmes, Hussey, NE, Nevill, JEG, Temple, AJ, Berggren, P, Vigliola, L, Magalon, H. 2019. Genetic population structure and demography of an apex predator, the tiger shark *Galeocerdo cuvier*. *Ecology and evolution*, 9(10), pp.5551–5571. doi: 10.1002/ece3.5111
- Poortvliet, M, Olsen, JL, Croll, DA, Bernardi, G, Newton, K, Kollias, O’Sullivan, J, Fernando, D, Stevens, G, Magaña, FG, Seret, B. 2015. A dated molecular phylogeny of manta and devil rays (Mobulidae) based on mitogenome and nuclear sequences. *Molecular phylogenetics and evolution*, 83, pp.72–85. doi: 10.1016/j.ympev.2014.10.012
- Puckridge, M, Last, PR, White, WT, Andreakis, N. 2013. Phylogeography of the Indo-West Pacific maskrays (Dasyatidae, *Neotrygon*): A complex example of chondrichthyan radiation in the Cenozoic. *Ecology and Evolution*, 3(2), pp.217–232. doi: 10.1002/ece3.448
- Rabaoui, L, Yacoubi, L, Sanna, D, Casu, M, Scarpa, F, Lin, YJ, Shen, K-N, Todd, CR, Arculeo, M, Qurban, MA. 2019. DNA barcoding of marine fishes from Saudi Arabian waters of the Gulf. *Journal of fish biology*, 95(5), pp.1286–1297. doi: <https://doi.org/10.1111/jfb.14130>
- Ramírez-Amaro, S, Ordines, F, Picornell, A, Castro, JA, Ramon, C, Massutí, E, Terrasa, B. 2018. The evolutionary history of Mediterranean Batoidea (Chondrichthyes: Neoselachii). *Zoologica Scripta*, 47(6), pp.686–698. doi: 10.1111/zsc.12315

- Ribeiro, ADO, Caires, RA, Mariguela, TC, Pereira, LHG, Hanner, R, Oliveira, C. 2012. DNA barcodes identify marine fishes of São Paulo State, Brazil. *Molecular Ecology Resources*, 12(6), pp.1012–1020. doi: 10.1111/1755-998.12007
- Richards, VP, Henning, M, Witzell, W, Shivji, MS. 2009. Species delineation and evolutionary history of the globally distributed spotted eagle ray (*Aetobatus narinari*). *Journal of heredity*, 100(3), pp.273–283. doi: 10.1093/jhered/esp005
- Sales, JBL, de Oliveira, CN, dos Santos, WCR, Rotundo, MM, Ferreira, Y, Ready, J, Sampaio, I, Oliveira, C, Cruz, VP, Lara-Mendoza, RE, da Silva Rodrigues-Filho, LF. 2019. Phylogeography of eagle rays of the genus *Aetobatus*: *Aetobatus narinari* is restricted to the continental western Atlantic Ocean. *Hydrobiologia*, 836(1), pp.169–183. doi: 10.1007/s10750-019-3949-0
- Sarmiento-Camacho, S, Valdez-Moreno, M. 2018. DNA barcode identification of commercial fish sold in Mexican markets. *Genome*, 61(6), pp.457–466. doi: 10.1139/gen-2017-0222
- Sayers EW, Agarwala R, Bolton EE, Brister JR, Canese K, Clark K, Connor, R, Fiorini, N, Funk, K, Hefferon, T, Holmes, BJ, Kim, S, Kimchi, A, Kitts, P, Lathrop, S, Lu, Z, Madden, TL, Marchler-Bauer, A, Phan, L, Schneider, VA, Schoch, C, Pruitt, KD, Ostell J. 2019 Database resources of the National Center for Biotechnology Information. *Nucleic Acids Research*, 8(Database issue), pp. D23–D28. doi: 10.1093/nar/gky1069
- Sembiring, A, Pertiwi, NPD, Mahardini, A, Wulandari, R, Kurniasih, EM, Kuncoro, AW, Cahyani, DNK, Anggoro, AW, Ulfa, M, Madduppa, H, Carpenter, KE, Barber, PH, Mahardika, GN. 2015. DNA barcoding reveals targeted fisheries for endangered sharks in Indonesia. *Fisheries Research*, 164, pp.130–134. doi: 10.1016/j.fishres.2014.11.003
- Spaet, JL, Berumen, ML. 2015. Fish market surveys indicate unsustainable elasmobranch fisheries in the Saudi Arabian Red Sea. *Fisheries Research*, 161, pp.356–364. doi: 10.1016/j.fishres.2014.08.022
- Steinke, D, Zemplak, TS, Hebert, PD. 2009. Barcoding Nemo: DNA-based identifications for the ornamental fish trade. *PLoS one*, 4(7), p.6300. doi: 10.1371/journal.pone.0006300
- Steinke, D, Connell, AD, Hebert, PD. 2015. Linking adults and immatures of South African marine fishes. *Genome*, 59(11), pp.959–967. doi: 10.1139/gen-2015-0212



- Sukumaran, S, Sebastian, W, Mukundan, LP, Menon, M, Akhilesh, KV, Zacharia, PU, Gopalakrishnan, A. 2020. Molecular analyses reveal a lack of genetic structuring in the scalloped hammerhead shark, *Sphyrna lewini* (Griffith & Smith, 1834) along the Indian coast. *Marine Biodiversity*, 50(2), pp.1–6. doi: 10.1007/s12526-020-01040-4
- Toha, AHA, Dailami, M, Anwar, S, Setiawan, JB, Jentewo, Y, Lapadi, I, Sutanto, S, Aryasari, R, Ambariyanto, Runtuboi, F, Madduppa, H. 2020. The genetic relationships and Indo-Pacific connectivity of whale sharks (*Rhincodon typus*) with particular reference to mitochondrial COI gene sequences from Cendrawasih Bay, Papua, Indonesia. *Biodiversitas Journal of Biological Diversity*, 21(5), pp.2159–2171. doi: 10.13057/biodiv/d210544
- Velez-Zuazo, X, Alfaro-Shigueto, J, Mangel, J, Papa, R, Agnarsson, I. 2015. What barcode sequencing reveals about the shark fishery in Peru. *Fisheries Research*, 161, pp.34–41. doi: 10.1016/j.fishres.2014.06.005
- Vella, A, Vella, N, Schembri, S. 2017. A molecular approach towards taxonomic identification of elasmobranch species from Maltese fisheries landings. *Marine genomics*, 36, pp.17–23. doi: 10.1016/j.margen.2017.08.008
- Ward, RD, Zemlak, TS, Innes, BH, Last, PR, Hebert, PD. 2005. DNA barcoding Australia's fish species. *Philosophical Transactions of the Royal Society B: Biological Sciences*, 360(1462), pp.1847–1857. doi: 10.1098/rstb.2005.1716
- Ward, RD, Holmes, BH. 2007. An analysis of nucleotide and amino acid variability in the barcode region of cytochrome c oxidase I (*cox1*) in fishes. *Molecular Ecology Notes*, 7(6), pp.899–907. doi: 10.1111/j.1471-8286.2007.01886.x
- Ward, RD, Holmes, BH, White, WT, Last, PR. 2008. DNA barcoding Australasian chondrichthyans: results and potential uses in conservation. *Marine and Freshwater Research*, 59(1), pp.57–71. doi: 10.1071/MF07148
- Wainwright, BJ, Ip, YCA, Neo, ML, Chang, JJM, Gan, CZ, Clark-Shen, N, Huang, D, Rao, M. 2018. DNA barcoding of traded shark fins, meat and mobulid gill plates in Singapore uncovers numerous threatened species. *Conservation Genetics*, 19(6), pp.1393–1399. doi: <https://doi.org/10.1007/s10592-018-1108-1>
- White, WT, Corrigan, S, Yang, L, Henderson, AC, Bazinet, AL, Swofford, DL, Naylor GJP. 2017. Phylogeny of the manta and devilrays (Chondrichthyes: Mobulidae), with an updated taxonomic arrangement for the family, *Zoological Journal of the Linnean Society*, 20, pp. 1–26. <https://doi.org/10.1093/zoolin/zlx018>.

Wong, EHK, Shivji, MS, Hanner, RH. 2009. Identifying sharks with DNA barcodes: assessing the utility of a nucleotide diagnostic approach. *Molecular Ecology Resources*, 9, 243–256. doi: 10.1111/j.1755-0998.2009.02653.x

Wynen, L, Larson, H, Thorburn, D, Peverell, S, Morgan, D, Field, I, Gibb, K. 2009. Mitochondrial DNA supports the identification of two endangered river sharks (*Glyphis glyphis* and *Glyphis garricki*) across northern Australia. *Marine and Freshwater Research*, 60(6), pp.554–562. doi: 10.1071/MF08201

Zemlak, TS, Ward, RD, Connell, AD, Holmes, BH, Hebert, PD. 2009. DNA barcoding reveals overlooked marine fishes. *Molecular Ecology Resources*, 9, pp.237–242. doi: 10.1111/j.1755-0998.2009.02649.x

Zhang, JB, Hanner, R. 2011. DNA barcoding is a useful tool for the identification of marine fishes from Japan. *Biochemical Systematics and Ecology*, 39(1), pp.31–42. doi: 10.1016/j.bse.2010.12.017

Zhang, J, Hanner, R. 2012. Molecular approach to the identification of fish in the South China Sea. *PLoS One*, 7(2), p.30621. doi: 10.1371/journal.pone.0030621

### References of unpublished sequences from GenBank

Aguilar, R, Ogburn, MB, Weigt, LA, Driskell, AC, Macdonald, KS, Hines, AH. 2020. Chesapeake Bay barcode initiative (CBBI): Fishes of the greater Chesapeake Bay. <https://www.ncbi.nlm.nih.gov/nuccore/MT456029.1>, MT456102.1, MT456076.1, MT455809.1, MT455794.1, MT455455.1, MT436657.1, MT455293.1, MT455246.1, MT455095.1, MT455080.1, MT455925.1, MT456066.1, MT455294.1, MT455848.1, MT455995.1, MT456051.1, MT456060.1, MT455256.1, MT456108.1, MT MT455235.1, MT455562.1, MT455748.1, MT456007.1, MT455337.1, MT455567.1, MT456041.1, MT455636.1, MT455637.1

Bamaniya, D, Lakra, WS, Kumar, PA, Gireesh, BP, Krishna, G, Sharma, N, Reang, D. 2016. DNA barcoding of selected deep sea fishes from Indian coast for accurate identification & management. <https://www.ncbi.nlm.nih.gov/nuccore/KJ093271.1>, KJ093272.1, KJ093273.1, KJ093274.1, KJ093275.1, KJ093276.1, KJ093278.1, KJ093277.1

Basumatary, G, De, TK, Mandal, S, Thakur, S. 2017. Molecular identification of stingrays. <https://www.ncbi.nlm.nih.gov/nuccore/MF495712.1>, MF495713.1, MF495714.1, MF495715.1

- Bentley, AC, Wiley, EO. 2013. University of Kansas Biodiversity Institute barcoding initiative. <https://www.ncbi.nlm.nih.gov/nuccore/KF930342.1>, KF930495.1
- Bhaskar, R, Das, MK. 2018. <https://www.ncbi.nlm.nih.gov/nuccore/MK331965.1>, MK331966.1
- Deepak, J, Diana, B, Jenson, RV, Harikrishnan, M, Madhusoodana, K. 2013. Molecular phylogeny of genus *Alopias* (thresher sharks). <https://www.ncbi.nlm.nih.gov/nuccore/KF700944.1>, KF700945.1
- Deepak, J, Jenson, RV, Diana, B, Harikrishnan, M, Madhusoodanakurup, B. 2013. A comparison of tiger shark *Galeocerdo cuvier* with a novel *Galeocerdo* species and its DNA barcoding. <https://www.ncbi.nlm.nih.gov/nuccore/JN657190.1>
- Habib, KA, Islam, MJ, Neogi, AK, Nahar, N, Rahman, SL, Mahmud, Y. 2019. Cataloging coastal fisheries of Bangladesh using DNA barcoding. <https://www.ncbi.nlm.nih.gov/nuccore/MN458374.1>, MN458407.1, MF614769.1
- Hacohen-Domene, A, Munguia-Vega, A, Polanco-Vasquez, F, Avalos, C. 2018. First DNA barcoding study of seafood in Guatemala reveals mislabeling and the presence of threatened sharks. <https://www.ncbi.nlm.nih.gov/nuccore/MK188807.1>, MK188824.1
- Hastings, P, Burton, R. 2010. Marine fishes of California. <https://www.ncbi.nlm.nih.gov/nuccore/GU440213.1>, GU440214.1, GU440259.1, GU440260.1, GU440502.1, GU440527.1, GU440486.1
- Iglesias, SP, Stephan, E, Diez, G, Lebon, PY, Mayoy, S, Frotte, L, Warneiz, A, Sellos, D. 2013. Records of rare mackerel sharks (Lamniformes) from North eastern Atlantic and Mediterranean waters: *Carcharodon carcharias*, *Mitsukurina owstoni* and *Odontaspis ferox*. <https://www.ncbi.nlm.nih.gov/nuccore/KM212005.1>
- Iglesias, SP, Mollen, FH, Tetard, A, Sellos, DY. 2013. Continuous taxonomic confusion of cryptic stingrays *Dasyatis tortonesei* and *D. Pastinaca* in European Atlantic waters needs conservation consideration. <https://www.ncbi.nlm.nih.gov/nuccore/KF808209.1>
- International Barcode of Life. 2010. <https://www.ncbi.nlm.nih.gov/nuccore/GU673375.1>, GU673386.1, GU673585.1, HM387141.1, GU674232.1, GU673374.1, HQ575754.1, HQ575767.1, GU673390.1, GU674092.1, GU674234.1, GU674235.1, GU674236.1, GU674396.1, GU674397.1, GU674399.1, GU674401.1, GU673481.1, GU673712.1, GU673713.1, GU674394.1, GU674395.1, GU673708.1, GU674230.1

International Barcode of Life. 2011. <https://www.ncbi.nlm.nih.gov/nuccore/HQ955940.1>, HQ955948.1, JN313266.1, JN312956.1, JN313301.1, JN313260.1, JN313261.1, HQ955999.1, HQ956000.1, JN313263.1, JN313264.1, HQ956137.1, JN312503.1, JN312504.1, JN312505.1, HQ956149.1, HM909793.1

Keskin, E. 2010. Phylogenetic analysis of species belong to order Lamniformes and Hexanchiformes. <https://www.ncbi.nlm.nih.gov/nuccore/HQ167643.1>, HQ167639.1, HQ167637.1, HQ167642.1, HQ167640.1, HQ167641.1

Khalil, AM, Gainsford, A, van Herwerden, L. 2015. DNA barcoding of Australian fresh seafood products reveals mixture of labelling successes and areas for improvement. <https://www.ncbi.nlm.nih.gov/nuccore/KU366634.1>, KU366614.1, KU366624.1, KU366628.1, KU366630.1

Jamaludin, NA, Mohd-Arshaad, W. 2017. DNA barcoding of sharks . <https://www.ncbi.nlm.nih.gov/nuccore/MG594062.1>, MG594055.1, MG594049.1

Li, H, Gao, Y, Fang, H. 2016. DNA barcoding for gill rakers of manta and devil rays (Mobulidae) from Chinese medicine markets in Guangzhou. <https://www.ncbi.nlm.nih.gov/nuccore/KX060791.1>, KX060792.1, KX060793.1, KX060794.1, KX060795.1, KX060796.1

Manjusha, S, Madhusoodanakurup, B. 2010. <https://www.ncbi.nlm.nih.gov/nuccore/HQ589266.1>, HQ589267.1, HM990646.1, HM990647.1, HM990648.1, HM990649.1, HM99051.1, HQ589285.1, HQ589286.1

Mohd-Arshaad, W, Ali, A, Pugas, AL. 2016. Identification of rays through DNA barcoding. <https://www.ncbi.nlm.nih.gov/nuccore/KX219586.1>

Mwangi, EW, Ndithia, HK, Njuguna, EG, Mwaura, AN. 2019. DNA barcoding to combat wildlife crime [Kenya]. <https://www.ncbi.nlm.nih.gov/nuccore/MK545100.1>, MK545101.1

Noorul-Azliana, J, Wahidah, MA. 2017. DNA barcoding of sharks. <https://www.ncbi.nlm.nih.gov/nuccore/MG644325.1>, MG644347.1, MG644275.1, MG644276.1

Song, CB, Kim, MJ. 2017. <https://www.ncbi.nlm.nih.gov/nuccore/MG573151.1>

- Prasannakumar, C, Ajmalkhan, S, Lyla, P, Murugan, S. 2008. DNA barcoding of Bay of Bengal fishes. <https://www.ncbi.nlm.nih.gov/nuccore/FJ384709.1>
- Ravi, RK, Venu, S, Bineesh, KK, Akhilesh, KV, Sajeela, KA, Basheer, VS, Gopalakrishnan, A. 2019. <https://www.ncbi.nlm.nih.gov/nuccore/MK422126.1>, MK422127.1, MK422128.1, MK422129.1, MK422130.1
- Santhanakrishnan, M, Mani, P, Ramakritinan, C. 2015. <https://www.ncbi.nlm.nih.gov/nuccore/KT794001.1>
- Segura-Garcia, I, Yain Tun, T. 2018. Unscrambling Myanmar marine fishery biodiversity using DNA barcoding. <https://www.ncbi.nlm.nih.gov/nuccore/MH235615.1>, MH235621.1, MH235722.1, MH235723.1, MH235645.1, MH235671.1, MH235670.1, MH235673.1, MH235674.1, MH235683.1
- Sijo, VP, Nishad, M, Shirke, SS. 2019. <https://www.ncbi.nlm.nih.gov/nuccore/MK492925.1>
- Vysakh, VG, Sandhya, S, Lakshmi, M. 2019. <https://www.ncbi.nlm.nih.gov/nuccore/MN017113.1>
- Yambot, AV, Alcantara, SG, Templonuevo, RMT. 2012. Molecular identification of high-values fish species at Cuyo, Palawan, Philippines. <https://www.ncbi.nlm.nih.gov/nuccore/KC970512.1>
- Yokes, MB. 2016. DNA barcoding of marine fish species from Turkish Coastline. <https://www.ncbi.nlm.nih.gov/nuccore/KY176421.1>, KY176701.1, KY176425.1, KY176702.1, KY176584.1, KY176708.1
- Zacharia, PU, Dhaneesh, KV, Shiyas, CA, Kishore, TG, Rekha Nair, J, Sobhana, KS, Sandhya, S, Pradeep, MA. 2014. Resource assessment and barcoding of elasmobranchs. [https://www.ncbi.nlm.nih.gov/nuccore/](https://www.ncbi.nlm.nih.gov/nuccore/KJ475202.1) KJ475202.1, KJ475200.1
- Zacharia, PU, Ambily, MN, Shiyas, CA, Kishore, TG, Ambily, L, Sobhana, KS, Rekha, JN, Najmudeen, TM, Shoba, JK, Swatipriyanka, SD, Sujitha, T, Purushottama, GB, Ranjith, L, Muktha, M, Manoj Kumar, PP, Saravanan, R, Akhilesh, KV, Santhosh, B. 2016. Resource assessment and barcoding of elasmobranchs. <https://www.ncbi.nlm.nih.gov/nuccore/KX063634.1>, KX063635.1, KX063636.1, KX063638.1, KX063639, KX063641.1
